# Supplementary material
Source: HighWire-hosted journal article supplement (https://erj.ersjournals.com/content/62/1/2202053)
Supplement: inline-supplementary-material-1 [file inline-supplementary-material-1.pdf]

## Supplementary material - 1

**Title:** European Respiratory Society statement on airway clearance techniques in adults with bronchiectasis.

**Authors:** Beatriz Herrero-Cortina, Annemarie L Lee, Ana Oliveira, Brenda O'Neill, Cristina Jácome, Simone Dal Corso, William Poncin, Gerard Muñoz, Deniz Inal-Ince, Victoria Alcaraz-Serrano, Gregory Reyhler, Angela Bellofiore, Annette Posthumus (patient representative), Patient representative, Thomy Tonia, James D Chalmers, Arietta Spinou.

**Table S1. Professional background and working groups of the European Respiratory Society (ERS)**

**Task Force panel.**

| Members                  | Speciality                              | Country     | Working group                     |
|--------------------------|-----------------------------------------|-------------|-----------------------------------|
| Beatriz Herrero-Cortina  | Respiratory Physiotherapist, Co-chair   | Spain       | <a href="#">Questions 1 and 2</a> |
| Annemarie Lee            | Respiratory Physiotherapist             | Australia   | <a href="#">Questions 5 and 6</a> |
| Ana Oliveira             | Respiratory Physiotherapist             | Portugal    | <a href="#">Questions 3 and 4</a> |
| Brenda O'Neill           | Respiratory Physiotherapist             | UK          | <a href="#">Questions 1 and 2</a> |
| Cristina Jácome          | Respiratory Physiotherapist             | Portugal    | <a href="#">Questions 5 and 6</a> |
| Simone Dal Corso         | Respiratory Physiotherapist             | Brazil      | <a href="#">Questions 5 and 6</a> |
| William Poncin           | Respiratory Physiotherapist             | Belgium     | <a href="#">Questions 1 and 2</a> |
| Gerard Muñoz             | Respiratory Physiotherapist             | Spain       | <a href="#">Questions 3 and 4</a> |
| Deniz Inal-Ince          | Respiratory Physiotherapist             | Turkey      | <a href="#">Questions 5 and 6</a> |
| Victoria Alcaraz-Serrano | Respiratory Physiotherapist             | Spain       | <a href="#">Questions 1 and 2</a> |
| Gregory Reyhler          | Respiratory Physiotherapist             | Belgium     | <a href="#">Questions 3 and 4</a> |
| Angela Bellofiore        | Respiratory Physiotherapist             | Italy       | <a href="#">Questions 1 and 2</a> |
| Annette Posthumus        | European Lung Foundation representative | Netherlands | <a href="#">Questions 1 and 2</a> |
| Patient Representative   | European Lung Foundation representative | Israel      | <a href="#">Questions 5 and 6</a> |
| James Chalmers           | Respiratory Physician                   | UK          | <a href="#">Questions 3 and 4</a> |
| Arietta Spinou           | Respiratory Physiotherapist, Co-chair   | UK          | <a href="#">Questions 3 and 4</a> |

UK, United Kingdom.

## **Selection criteria for the studies**

### *Types of studies*

For a representative overview of the use of airway clearance techniques (ACTs) in bronchiectasis, a wide variety of studies were considered in our general search: clinical trials (randomised controlled trials, randomised crossover trials; quasi-experimental trials); observational studies (cross-sectional, case-control and cohort studies) and qualitative studies. However, only randomised controlled trials and randomised crossover trials were included to explore the Question 4 (clinical effectiveness) and Question 5 (risk of bias and facilitate comparison between findings). Secondary studies i.e., narrative and systematic reviews, were only included in Question 1 and Question 2. This was due to the topic addressed (physiological /pathophysiological rationale), which is commonly updated using reviews and the difficulty in finding relevant original articles (failed sensitive analysis) despite re-designing the search strategy twice. More detailed information on the specific criteria used for selecting studies for each Question is available in supplementary material 2.

### *Participants*

Our generic selection criteria were adults ( $\geq 18$  years) with a diagnosis of bronchiectasis using high-resolution computed tomography and clinical symptoms without any restriction based on disease severity, daily sputum expectoration and/or clinical status (e.g., stable or exacerbation). Overlap syndromes (e.g., bronchiectasis with chronic obstructive pulmonary disease, COPD, or bronchiectasis with asthma) were included, but people with cystic fibrosis were excluded. Data from studies recruiting with different respiratory diseases (e.g., bronchiectasis and COPD) were only included if it was possible to separately extract data from people with bronchiectasis.

Specifically for the physiological/pathophysiological Questions 1 and 2, the selection criteria were extended to in vitro and animal model studies, due to the limited information on this topic in bronchiectasis. The panel also agreed to extend the population to muco-obstructive respiratory diseases (e.g., cystic fibrosis, COPD, etc.) and to healthy people for Questions 1 and 2. Additional information in methodology is available in supplementary material 2.

### Intervention

Airway clearance techniques were defined as all manual or instrumental techniques and devices that were developed with the main purpose to enhance mucus clearance and manage sputum. We considered single and combined interventions, irrespective of the treatment duration (short and long-term) and based on HERMES (harmonised education in respiratory medicine for European specialists) physiotherapy curriculum [1].

As the panel agreed to focus only on the interventions specifically developed primarily to increase sputum clearance and improve the management of sputum-related symptoms; therefore, techniques with a different primary objective, such as exercise, respiratory muscle training, education of ACTs in a rehabilitation programme and non-invasive ventilation were excluded from this statement. The current evidence on exercise as a potential therapy option to enhance airway clearance is mostly based on pulmonary rehabilitation trials, where ACTs are considered an active component of the programme or an educational approach [2, 3]. Therefore, the ability to identify the effect of the ACTs undertaken by participants in addition to the exercise training (combination of aerobic and resistance training) is not currently possible. Furthermore, the measurements used in these trials do not specifically focus on sputum-related outcomes[2-4] and it is hard to comment on its use as an ACT. Moreover, ACTs may be part of the usual care of patients with bronchiectasis participating in pulmonary rehabilitation/exercise trials (similar to patients with cystic fibrosis). In these studies, since

it is unusual to consider the use of ACTs as an exclusion criterion for the trial, there is a great risk of confounding and bias.

On the other hand, most of the evidence of the role of NIV as an ACT comes from patients with cystic fibrosis, especially, in end-stage severe disease or during exacerbations. The use of NIV helps to reduce patient fatigue and respiratory rate, avoid airway dynamic collapse, and maintain oxygenation during airway clearance sessions. In fact, it is common to evaluate the effect of NIV in combination with other ACTs (e.g., forced expiratory technique, active cycle of breathing technique)[5, 6]. Therefore, the panel agreed that NIV is used as support for the ACTs and is considered more often an adjuvant to ACTs rather than an ACT in itself. Thus, the definition of ACTs we agreed on in our methods resulted in excluding NIV from our work. Finally, other airway clearance methods such as humidification, mucocactive agents, other drugs and invasive methods were also outside the scope of this task force.

### Search methods

The databases Medline (Ovid), EMBASE, Scopus, AMED, CINAHL, Cochrane CENTRAL and PEDro were used to identify studies. Only articles in English were selected from their inception in these databases. For Question 2, articles in other languages (e.g., French, Spanish, Portuguese, Italian) were allowed to ensure the collection of information on ACTs not developed in Anglo-Saxon countries. These studies were analysed by members of the panel who are native speakers of that language. First literature searches were conducted in November 2020 and an update search was conducted at the end of November 2021. Panel agreed to use the reference lists of all full text articles included in Question 4 for identification of potential reports for Questions 1 and 2 after search strategies failed to find relevant original articles (failed the sensitivity analysis).

## Additional information about methodology applied

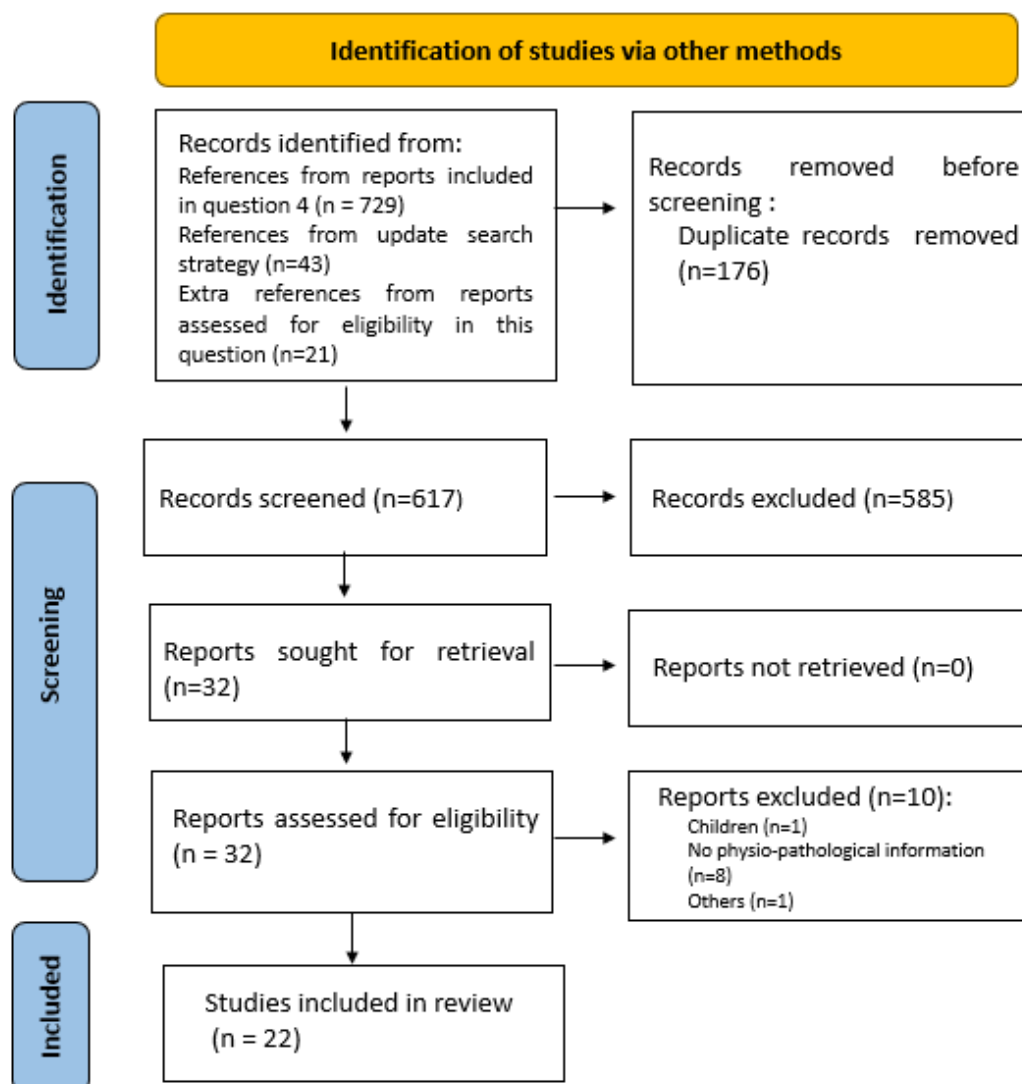

**Figure S1.** Literature search flow diagram for Question 1 - *What is the physiological rationale for the use for ACTs in adults with bronchiectasis?*

**Table S2.** Summary of the main features of studies included for Question 1 - *What is the physiological rationale for the use for ACTs in adults with bronchiectasis?*

| First author, year, country         | Publication type | Study design     | Human / animal / in vitro / others | Population / origin of samples                                                                       | Topic                                                        | Relevant findings related to this question                                                                                                                                                                                                                                                                                                                              |
|-------------------------------------|------------------|------------------|------------------------------------|------------------------------------------------------------------------------------------------------|--------------------------------------------------------------|-------------------------------------------------------------------------------------------------------------------------------------------------------------------------------------------------------------------------------------------------------------------------------------------------------------------------------------------------------------------------|
| Mead et al.[7]<br>1970, USA         | Secondary        | Narrative review | Mathematical models                | N/A                                                                                                  | Airway physiology (interdependence / collateral ventilation) | The main function of the mechanical interdependence seems to be to promote a homogeneous air opening. The interdependence of air-space distension influences the size of air spaces, the static and dynamic stability of air spaces, the dryness of air spaces, the forces distending airways and blood vessels within lungs, and the distribution of pulmonary oedema. |
| Kim et al.[8]<br>1986, USA          | Primary          | Experimental     | In vitro                           | Sputum samples with similar rheological properties than healthy and people with respiratory diseases | Airway clearance                                             | Mucus transport by two-phase gas-liquid flow mechanism depends on the airway surface liquid layer thickness and rheological properties of fluid.                                                                                                                                                                                                                        |
| Kim et al.[9]<br>1987, USA          | Primary          | Experimental     | In vitro                           | Sputum samples with similar rheological properties than healthy and people with respiratory diseases | Airway clearance                                             | Effective mucus clearance can be achieved by two-phase gas-liquid flow mechanism in patients with excessive bronchial secretions with biased tidal breathing favouring the expiratory flow and that the clearance can be further promoted by changing rheological properties of mucus.                                                                                  |
| Crawford et al.[10] 1989, Australia | Primary          | RXT              | Human                              | Healthy people                                                                                       | Airway physiology (ventilation distribution)                 | The main factor of ventilation distribution below closing capacity is the inhomogeneous closure of airways subtending regions in the lung periphery that are close together.                                                                                                                                                                                            |
| Girod et al.[11]<br>1992, France    | Secondary        | Narrative review | In vitro                           | Chronic bronchitis<br>Cystic fibrosis                                                                | Biophysical properties of mucus/sputum                       | Airway mucus needs appropriate rheological (viscoelasticity and spinnability) and physical surface (adhesiveness, wettability) properties                                                                                                                                                                                                                               |

|                                   |           |                  |                  |                                                                                                                  |                                                   |                                                                                                                                                                                                                                                                      |
|-----------------------------------|-----------|------------------|------------------|------------------------------------------------------------------------------------------------------------------|---------------------------------------------------|----------------------------------------------------------------------------------------------------------------------------------------------------------------------------------------------------------------------------------------------------------------------|
|                                   |           |                  |                  |                                                                                                                  |                                                   | for the protection, hydration and lubrication of the underlying airway epithelium.                                                                                                                                                                                   |
| Randell et al.[12] 2006, USA      | Secondary | Narrative review | In vitro / human | Cystic fibrosis, CODP                                                                                            | Airway clearance                                  | Summary of the structure and function of airway clearance system, its regulation and how genetic or acquired disease impacts on its functionality.                                                                                                                   |
| Button et al.[13] 2008, USA       | Primary   | CSS              | In vitro / human | Bronchiectasis, Cystic fibrosis, Chronic bronchitis                                                              | Airway clearance                                  | Airway mechanical stress stimulates mucus clearance via increases in rates of ATP release into the luminal compartment, resulting in increases in ASL hydration.                                                                                                     |
| Rubin et al.[14] 2010, USA        | Secondary | Narrative review | Human            | Cystic fibrosis, Chronic bronchitis                                                                              | Cough clearance / biophysical properties of mucus | The greatest determinant of cough transportability is not viscoelasticity but tenacity, which is the product of adhesivity and cohesivity. Treatments for ineffective cough should consider the interaction between biophysical properties and cough mechanism.      |
| Rubin et al.[15] 2010, USA        | Secondary | Narrative review | In vitro / human | Bronchiectasis, Cystic fibrosis, Chronic bronchitis PCD                                                          | Airway clearance                                  | Summary of the composition and structure of mucus and phlegm, the mucin secretion and how is the function of the mucus clearance system. Therapies to improve mucus clearance were also described.                                                                   |
| Tambascio et al.[16] 2013, Brazil | Primary   | CSS              | In vitro / human | Bronchiectasis                                                                                                   | Biophysical properties of mucus / sputum          | Respiratory secretions in individuals with bronchiectasis have poor transport properties, which manifest as reduced mucociliary transport, reduced mucus transport by cough, and higher contact angle. These features were more accentuated in the purulent samples. |
| Button et al.[17] 2013, USA       | Secondary | Narrative review | In vitro / human | Cystic fibrosis                                                                                                  | Airway clearance / Action mechanism of ACTs       | The application of mechanical stress on airway epithelia promotes changes in ion transport and increases ASL hydration. ACTs used in CF are described based on their mechanism of action.                                                                            |
| Rubin et al.[18] 2014, USA        | Secondary | Narrative review | Human            | Bronchiectasis, Cystic fibrosis, Chronic bronchitis Lung cancer, Allergy Asthma, Fucosidosis, Plastic bronchitis | Biophysical properties of mucus / sputum          | Mucus production and biophysical properties of sputum change with the progression of the airway diseases. Thus, sputum samples may be a good biomarker to identify the severity of airway diseases.                                                                  |

|                               |           |                  |                  |                                       |                  |                                                                                                                                                                                                                                                                                                                                                                                                                                                                                                                                                                                |
|-------------------------------|-----------|------------------|------------------|---------------------------------------|------------------|--------------------------------------------------------------------------------------------------------------------------------------------------------------------------------------------------------------------------------------------------------------------------------------------------------------------------------------------------------------------------------------------------------------------------------------------------------------------------------------------------------------------------------------------------------------------------------|
|                               |           |                  |                  |                                       |                  |                                                                                                                                                                                                                                                                                                                                                                                                                                                                                                                                                                                |
| Anderson et al.[19] 2015, USA | Primary   | CSS              | In vitro / human | Chronic bronchitis                    | Airway clearance | Alterations in the outcomes related to mucus concentration (e.g., extracellular nucleotide / nucleoside-dependent, airway hydration and mucin secretion rates) may slow mucociliary clearance and contribute to disease pathogenesis and loss of lung function in chronic bronchitis.                                                                                                                                                                                                                                                                                          |
| Sibila et al.[20] 2015, UK    | Primary   | CSS              | Human            | Bronchiectasis                        | Airway infection | Airway mucin (MUC2) levels were higher in bronchiectasis patients colonised with PPM compared with those without airway colonisation, especially in patients with P. aeruginosa. These findings suggest that airway-secreted mucins levels may play a role in the pathogenesis of airway infection in bronchiectasis                                                                                                                                                                                                                                                           |
| Button et al.[21] 2016, USA   | Secondary | Narrative review | In vitro / human | Chronic bronchitis<br>Cystic fibrosis | Airway clearance | In health, the osmotic modulus/ pressure of the PCL exceeds that of the mucus layer, resulting in efficient, low-friction movement of mucus. In disease, through multiple mechanisms, the osmotic pressure of the mucus begins to exceed basal PCL values, resulting in compression of the cilia and slowing of mucus transport. Mucus hyperconcentration (mucin overproduction and/or abnormal regulation of ion/water transport), may be a simple method to diagnose chronic bronchitis, monitor its progression, and serve as a biomarker for development of new therapies. |
| Bennett et al.[22] 2016, USA  | Secondary | Narrative review | In vitro / human | Chronic bronchitis<br>Cystic fibrosis | Airway clearance | There is growing evidence that chronic bronchitis and cystic fibrosis may have parallels in disease pathogenesis as well, including cystic fibrosis transmembrane conductance regulator dysfunction, mucus dehydration, and defective mucociliary clearance.                                                                                                                                                                                                                                                                                                                   |



|                                       |           |                   |       |                                                              |                     |                                                                                                                                                                                                                                                                                                       |
|---------------------------------------|-----------|-------------------|-------|--------------------------------------------------------------|---------------------|-------------------------------------------------------------------------------------------------------------------------------------------------------------------------------------------------------------------------------------------------------------------------------------------------------|
| Chalmers et al.[23] 2017, UK          | Primary   | CSS               | Human | Bronchiectasis                                               | Airway inflammation | Sputum neutrophil elastase activity is a biomarker of disease severity and future risk in adults with bronchiectasis.                                                                                                                                                                                 |
| McIlwaine et al.[24] 2017, Canada     | Secondary | Narrative review  | Human | Chronic suppurative lung diseases (including bronchiectasis) | Airway clearance    | Description on how to provide a personalised approach to selecting the most appropriate ACT for each patient. It is based on a synthesis of the physiological evidence that supports the modulation of ventilation and expiratory airflow as a means of assisting airway clearance.                   |
| Gramegna et al.[25] 2017, Italy       | Secondary | Systematic review | Human | Bronchiectasis                                               | Airway inflammation | Sputum neutrophil elastase is useful as an inflammatory marker both in stable state bronchiectasis and during exacerbations and local or systemic antibiotic treatment. Neutrophil elastase has also been associated with risk of exacerbation, time to next exacerbation and all-cause mortality.    |
| Flume et al.[26] 2018, UK             | Secondary | Narrative review  | Human | Bronchiectasis                                               | Pathophysiology     | Description of the pathophysiology of bronchiectasis and an in-depth understanding of the endotypes and clinical phenotypes of this disease.                                                                                                                                                          |
| Contarini et al.[27] 2018, UK / Italy | Secondary | Narrative review  | Human | PCD Bronchiectasis                                           | Pathophysiology     | Primary ciliary dyskinesia (PCD) is a genetic cause of bronchiectasis in which failure of motile cilia leads to poor mucociliary clearance. This study summarises the current literature describing why, when and how to investigate PCD in adult patients with bronchiectasis.                       |
| Ramsey et al.[28] 2020, USA           | Primary   | CSS               | Human | Bronchiectasis                                               | Airway clearance    | Bronchiectasis sputum exhibited increased percent solids, total and individual (MUC5B and MUC5AC) mucin concentrations, osmotic pressure and elastic and viscous moduli compared with healthy sputum. Hyperconcentrated airway mucus likely contributes to disease pathophysiology in bronchiectasis. |

ASL, airway surface layer; CF, cystic fibrosis; PCD, primary ciliary dyskinesia; PCL, periciliary layer; PPM, potentially pathogenic microorganisms; ACT, airway clearance techniques; CSS, cross-sectional; RXT, randomised crossover trial; NA= not applied

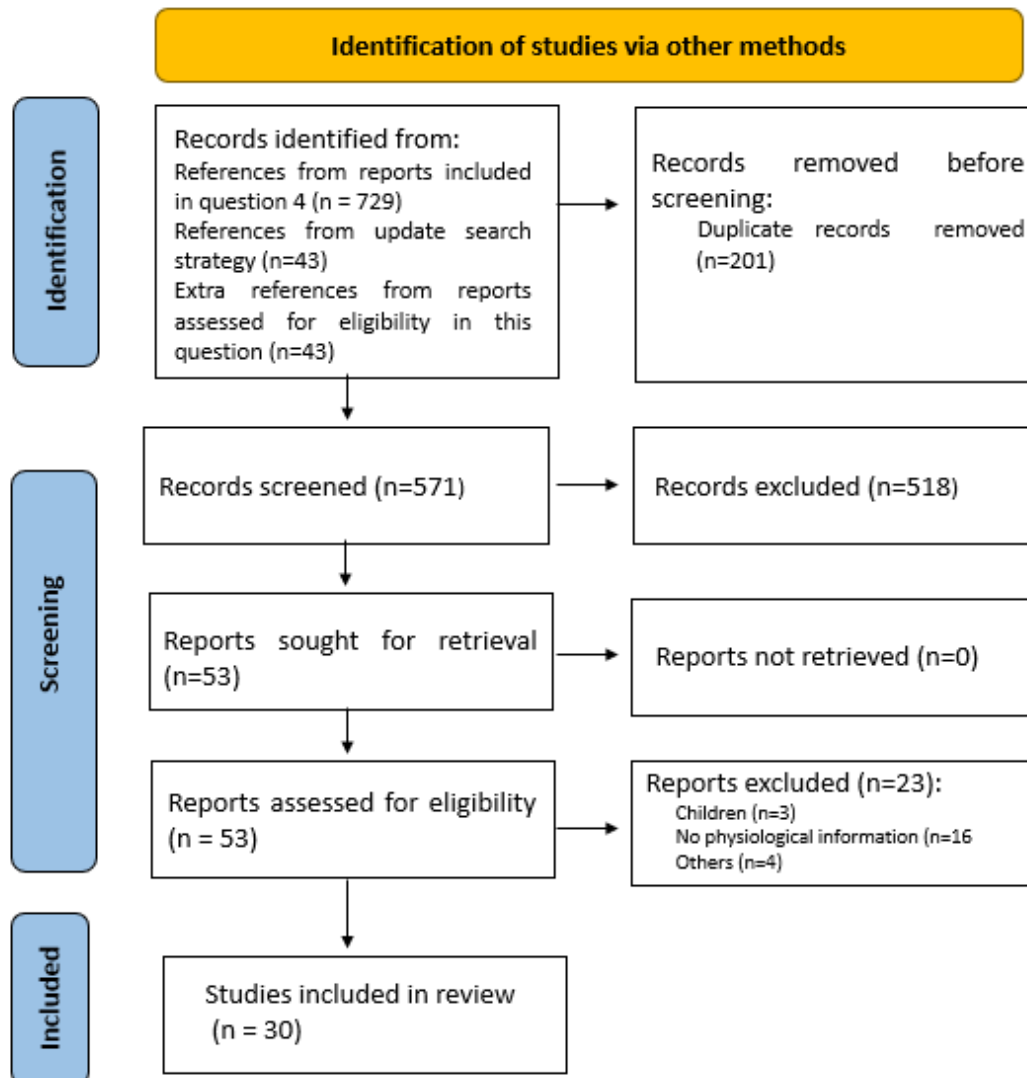

**Figure S2.** Literature search flow diagram for Question 2 - *What is the physiological rationale of each one of the ACTs and what are the advantages and limitations of each technique?*

**Table S3.** Summary of the main features of studies included for Question 2 - *What is the physiological rationale of each one of the ACTs and what are the advantages and limitations of each technique?*

| First author, year, country  | Publication type | Study design    | Human / animal / in vitro / others | Population / Origin of samples                                                | Topic                                     | Relevant findings related to this question                                                                                                                                                                                                                                                                                                                                                                                                                                                                                                                                                            |
|------------------------------|------------------|-----------------|------------------------------------|-------------------------------------------------------------------------------|-------------------------------------------|-------------------------------------------------------------------------------------------------------------------------------------------------------------------------------------------------------------------------------------------------------------------------------------------------------------------------------------------------------------------------------------------------------------------------------------------------------------------------------------------------------------------------------------------------------------------------------------------------------|
| Mead et al.[29]<br>1967, USA | Primary          | Cross-sectional | Mathematical models                | N/A                                                                           | Airway physiology (equal pressure points) | Equal pressure points refer to the points where the pressure at the inner wall of the airways is equal to the pleural pressure. During forced expirations, there are points within airways that equal pleural pressure, and the pressure drop from alveoli to these points approximates the static recoil pressure of the lungs. The resistance of these segments has a frictional component which increases as lung volume decreases and an accelerative component which decreases as lung volume decreases.                                                                                         |
| Pryor et al.[30]<br>1979, UK | Primary          | RXT             | Human                              | Cystic fibrosis                                                               | ACTs                                      | During a forced expiratory manoeuvre, there are forces tending to collapse or compress the airways downstream (towards the mouth) of the equal pressure point. This dynamic compression is an essential part of the mechanism of a huff or cough, which is therefore effective only at the compression points (choke points) downstream of the equal pressure point. These choke points move upstream (towards the alveoli) as the lung volume decreases.<br>The FET + GAD cleared more sputum in less time than manual percussion applied by a physiotherapist + GAD in people with cystic fibrosis. |
| Kim et al.[8]<br>1986, USA   | Primary          | Experimental    | In vitro                           | Sputum samples with similar rheologic properties than healthy and people with | Airway clearance                          | Mucus transport by two-phase gas-liquid flow mechanism depends on the airway surface liquid layer thickness and rheological properties of fluid.                                                                                                                                                                                                                                                                                                                                                                                                                                                      |

|                                             |           |                  |          |                                                                                                      |                  |                                                                                                                                                                                                                                                                                           |
|---------------------------------------------|-----------|------------------|----------|------------------------------------------------------------------------------------------------------|------------------|-------------------------------------------------------------------------------------------------------------------------------------------------------------------------------------------------------------------------------------------------------------------------------------------|
|                                             |           |                  |          | respiratory diseases                                                                                 |                  |                                                                                                                                                                                                                                                                                           |
| Kim et al.[9] 1987, USA                     | Primary   | Experimental     | In vitro | Sputum samples with similar rheological properties than healthy and people with respiratory diseases | Airway clearance | Effective mucus clearance can be achieved by two-phase gas-liquid flow mechanism in patients with excessive bronchial secretions with flow-bias tidal breathing favouring the expiratory flow and that the clearance can be further promoted by changing rheological properties of mucus. |
| Postiaux et al.[31] 1990, France            | Primary   | RXT              | Human    | COPD                                                                                                 | ACTs             | It is described how to perform the ELTGOL technique and showed that ELTGOL technique enhances greater mucus clearance than control period in lateral position (especially in the dependent lung) using scintigraphy.                                                                      |
| Lannefors et al.[32] 1992, Sweden           | Primary   | RXT              | Human    | Cystic fibrosis                                                                                      | ACTs             | No difference in mucus clearance using scintigraphy was observed between GAD, PEP and exercise in people with cystic fibrosis. Surprisingly, GAD in the left position promoted greater mucus clearance in the dependent lung (left) than in the right lung.                               |
| App et al.[33] 1998, Canada                 | Primary   | RXT              | Human    | Cystic fibrosis                                                                                      | ACTs             | Oscillations applied using an O-PEP device (Flutter) are capable of decreasing mucus viscoelasticity in patients with cystic fibrosis.                                                                                                                                                    |
| van der Schans et al.[34] 1999, Netherlands | Secondary | Narrative review | Human    | Bronchiectasis<br>COPD<br>Cystic fibrosis<br>Asthma                                                  | ACTs             | Description the mechanism of actions of various ACTs and outcome measures to assess the effects of ACTs combined data from different respiratory diseases.                                                                                                                                |
| Pryor et al.[35]1999, UK                    | Secondary | Narrative review | Human    | Bronchiectasis<br>Cystic fibrosis<br>Asthma                                                          | ACTs             | Description of how to perform each technique and its physiological principles.                                                                                                                                                                                                            |
| Cecins et al.[36] 1999, Australia           | Primary   | RXT              | Human    | Bronchiectasis<br>Cystic fibrosis<br>PCD                                                             | ACTs             | No difference was observed in sputum expectorated between ACBT in gravity-assisted drainage positions with or without a head-down tilt. However, breathlessness was higher following the technique in head-down tilt. Patients preferred the ACBT without a head-down tilt.               |

|                                     |           |                    |              |                                       |      |                                                                                                                                                                                                                                                                                                                                                                      |
|-------------------------------------|-----------|--------------------|--------------|---------------------------------------|------|----------------------------------------------------------------------------------------------------------------------------------------------------------------------------------------------------------------------------------------------------------------------------------------------------------------------------------------------------------------------|
| Wong et al.[37]2003, Singapore      | Primary   | Quasi-experimental | Animal model | N/A                                   | ACTs | Manual clapping, vibration, and shaking applied by physiotherapists increase expired tidal volume but not peak expiratory flow rate in an animal model. No significant hemodynamic effects were observed during the manoeuvres. The rates achieved during vibrations and shaking are related to physiotherapists' characteristics, particularly clinical experience. |
| Dosman et al.[38] 2005, Canada      | Secondary | Narrative review   | Human        | Various respiratory diseases          | ACTs | Description the history, mechanism of actions and global effectiveness of HFCWO                                                                                                                                                                                                                                                                                      |
| McCarren et al.[39] 2006, Australia | Primary   | RXT                | Human        | Healthy people                        | ACTs | During manual vibration the chest behaves as a highly linear system. Changes in intrapleural pressure occurring during vibration appear to be the sum of changes in pressure due to lung recoil and the compressive and oscillatory components of the technique, which suggests that all three components are required to optimise expiratory flow.                  |
| McCarren et al.[40] 2006, Australia | Primary   | RXT                | Human        | Cystic fibrosis                       | ACTs | Peak expiratory flow rate of manual vibration was greater than Flutter (O-PEP), manual percussion, Acapella (O-PEP) and PEP. Vibrations generate lower oscillations of the airflow than Acapella and Flutter (both O-PEP), but similar to manual percussion.                                                                                                         |
| Agostini et al.[41] 2007, UK        | Secondary | Narrative review   | Human        | Cystic fibrosis<br>Chronic bronchitis | ACTs | Description of the technique (based on previous report from J. Chevallier), offering explanations about how the technique works to enhance sputum clearance and evidence supporting its use                                                                                                                                                                          |
| Martins et al.[42] 2012, Brazil     | Primary   | RXT                | Human        | COPD                                  | ACTs | ELTGOL significantly increased mucus clearance in the peripheral area of the infralateral lung in patients with stable chronic bronchitis, most of whom had mild to moderate COPD.                                                                                                                                                                                   |
| Riffard et al.[43] 2012, France     | Secondary | Narrative review   | N/A          | N/A                                   | ACTs | Description of the device (IPV), its action mechanism to improve ventilation and enhance sputum clearance and how to set it according to your target treatment.                                                                                                                                                                                                      |

|                                       |           |                    |                  |                                                              |                                                              |                                                                                                                                                                                                                                                                                     |
|---------------------------------------|-----------|--------------------|------------------|--------------------------------------------------------------|--------------------------------------------------------------|-------------------------------------------------------------------------------------------------------------------------------------------------------------------------------------------------------------------------------------------------------------------------------------|
| Button et al.[17] 2013, USA           | Secondary | Narrative review   | In vitro / human | Cystic fibrosis                                              | Airway clearance / Action mechanism of ACTs                  | The application of mechanical stress on airway epithelia promotes changes in ion transport and increases ASL hydration. ACTs used in CF are described based on their mechanism of action.                                                                                           |
| Testa et al.[44] 2015, Italy          | Primary   | Quasi-experimental | Human            | COPD                                                         | ACTs                                                         | Short-term combination of IPV and various techniques (ELTGOL, PEP mask, PEP bottle, FET and cough) improves PO <sub>2</sub> , SpO <sub>2</sub> and perceived dyspnea than the other techniques in patients with COPD and productive cough.                                          |
| Lanza et al.[45] 2015, Brazil         | Primary   | Cross-sectional    | Human            | Bronchiectasis                                               | ACTs                                                         | ELTGOL mobilised more than 80% of expiratory reserve volume in subjects with moderate airway obstruction; there is no difference in ERV exhaled during the technique applied by a physiotherapist or by the subject.                                                                |
| Fagevik-Olsen et al.[46] 2015, Sweden | Secondary | Narrative review   | Human            | Bronchiectasis<br>Cystic fibrosis<br>COPD<br>Asthma          | ACTs                                                         | Description of the purpose, performance, clinical application, and underlying physiology of PEP when it is used to increase lung volumes, decrease hyperinflation or improve airway clearance.                                                                                      |
| Terry et al.[47] 2016, USA            | Secondary | Narrative review   | Human            | Various respiratory diseases                                 | Airway physiology (interdependence / collateral ventilation) | Description of the anatomical pathways of collateral ventilation, their physiology and relationship to disease states, their modulatory effects on gas exchange, treatment considerations, and their effect on diagnostic procedures.                                               |
| McIlwaine et al.[24] 2017, Canada     | Secondary | Narrative review   | Human            | Chronic suppurative lung diseases (including bronchiectasis) | Airway clearance                                             | Description on how to provide a personalised approach to selecting the most appropriate ACT for each patient. It is based on a synthesis of the physiological evidence that supports the modulation of ventilation and expiratory airflow as a means of assisting airway clearance. |
| Lee et al.[48] 2017, Australia        | Secondary | Systematic Review  | Human            | Bronchiectasis                                               | ACTs                                                         | Systematic review providing extensive information about physiological rationale for PEP devices, especially explained how the intervention might work                                                                                                                               |
| Taher et al.[49] 2018, USA            | Primary   | Quasi-experimental | Human            | Healthy subjects<br>COPD                                     | Airway physiology (interdependence / collateral ventilation) | Chest wall strapping induces breathing at low lung volumes but also increases parenchymal elastic recoil. Chest wall strapping increases                                                                                                                                            |

|                                      |           |                   |       |                                                     |      |                                                                                                                                                                                                                                                                                                                                                                                                                                                                                                                                                                                                                                            |
|--------------------------------------|-----------|-------------------|-------|-----------------------------------------------------|------|--------------------------------------------------------------------------------------------------------------------------------------------------------------------------------------------------------------------------------------------------------------------------------------------------------------------------------------------------------------------------------------------------------------------------------------------------------------------------------------------------------------------------------------------------------------------------------------------------------------------------------------------|
|                                      |           |                   |       |                                                     |      | expiratory airflow in normal subjects as well as subjects with mild to moderate COPD.                                                                                                                                                                                                                                                                                                                                                                                                                                                                                                                                                      |
| Nicolini et al.[50] 2018, Italy      | Primary   | RCT               | Human | COPD                                                | ACTs | HFCWO and IPV improved daily life activities and lung function in patients with severe COPD. IPV demonstrated a significantly greater effectiveness in improving some pulmonary function tests linked to the small bronchial airways obstruction and respiratory muscle strength and scores on health status assessment scales as well as a reduction of sputum inflammatory cells compared with HFCWO.                                                                                                                                                                                                                                    |
| Wong et al.[51] 2018, New Zealand    | Secondary | Narrative review  | Human | Bronchiectasis                                      | ACTs | In the ELTGOL technique, the volume of the dependent lung is reduced by placing the patient in the lateral decubitus position and by limiting breathing to expiratory reserve volume. This reduces the total cross-sectional area of the peripheral airways where mucus is primarily produced. Since maximum airflow velocity is inversely proportional to airway diameter, the velocity of airflow in the peripheral airways is increased. Airway patency is maintained by increasing intraluminal pressure via slow expiration through an open glottis. Overall, this results in greater clearance of mucus from the peripheral airways. |
| Reychler G. et al.[52] 2018, Belgium | Secondary | Systematic Review | Human | Bronchiectasis<br>Cystic fibrosis<br>COPD<br>Asthma | ACTs | The main findings showed that IPV improves gas exchange during exacerbation and could reduce the hospital length of stay for patients with COPD. In subjects with cystic fibrosis, neither lung function nor other parameters were improved. IPV is poorly studied in bronchiectasis (only one study was included).                                                                                                                                                                                                                                                                                                                        |
| de Souza et al.[53] 2019, Brazil     | Primary   | RXT               | Human | Bronchiectasis                                      | ACTs | The oscillatory PEP technique was effective for the removal of secretions and in decreasing total and peripheral respiratory system resistance, thoracic compression had comparable positive effects on the peripheral resistance                                                                                                                                                                                                                                                                                                                                                                                                          |

|                               |         |                    |          |     |      |                                                                                                                                                                                                                                                                                                       |
|-------------------------------|---------|--------------------|----------|-----|------|-------------------------------------------------------------------------------------------------------------------------------------------------------------------------------------------------------------------------------------------------------------------------------------------------------|
| Demchuck et al.[54] 2021, USA | Primary | Quasi-experimental | In vitro | N/A | ACTs | PEP devices behaved similarly, with increased pressure with increased flow (flow resistors) or flow independence (threshold resistors). There was much greater variation in the performance of the O-PEP devices. A higher oscillation index indicates better mechanical performance characteristics. |
|-------------------------------|---------|--------------------|----------|-----|------|-------------------------------------------------------------------------------------------------------------------------------------------------------------------------------------------------------------------------------------------------------------------------------------------------------|

RXT, randomised crossover trial; RCT, randomised controlled trial; FET, forced expiration technique; GAD, gravity-assisted drainage; PEP, positive expiratory pressure; O-PEP, oscillations positive expiratory pressure; ACTs, airway clearance techniques; HFCWO, high frequency chest wall oscillations; COPD, chronic obstructive pulmonary disease; IPV, intrapulmonary percussive ventilation; PCD, primary ciliary dyskinesia; NA= not applied

**Table S4. Description and physiological rationale of each airway clearance technique (ACT).**

| Airway clearance techniques not requiring devices                                                                                                                                                                                                                                                       |                                                                                                                                                                                                                                                                                                                                                                                                                                                                                                                                                                                                                                                                       |
|---------------------------------------------------------------------------------------------------------------------------------------------------------------------------------------------------------------------------------------------------------------------------------------------------------|-----------------------------------------------------------------------------------------------------------------------------------------------------------------------------------------------------------------------------------------------------------------------------------------------------------------------------------------------------------------------------------------------------------------------------------------------------------------------------------------------------------------------------------------------------------------------------------------------------------------------------------------------------------------------|
| Forced Expiration Technique (FET)                                                                                                                                                                                                                                                                       |                                                                                                                                                                                                                                                                                                                                                                                                                                                                                                                                                                                                                                                                       |
| <u>Description</u>                                                                                                                                                                                                                                                                                      | <u>Mechanisms of action</u>                                                                                                                                                                                                                                                                                                                                                                                                                                                                                                                                                                                                                                           |
| Consists of forced expirations through the mouth while maintaining an open glottis (huffs). Huffing or FET from low lung volumes moves secretions downstream (towards the mouth) from more peripheral airways. Huffing or FET from mid and high lung volumes clears secretions from the central airways | <ul style="list-style-type: none"> <li>▪ The underlying principle is based on the equal pressure point, i.e., the point at which pressure in the airways is equal to pressure outside the airways (pleural pressure) [29, 30].</li> <li>▪ Lung volumes are voluntarily altered, depending on the depth of inspiration and this can facilitate movement of the equal pressure point.</li> <li>▪ FET displaces the position of the equal pressure point to a more distal or proximal airway position.</li> <li>▪ Additionally, high expiratory flows are generated during the FET, which helps create shearing forces to move mucus through the airways [34]</li> </ul> |



## Active Cycle of Breathing Techniques (ACBT)

### Description

The ACBT has 3 key components: breathing control (relaxed breathing at tidal volume), thoracic expansion exercises (deep breathing above tidal volume towards full inspiration) and FET (Please see above section on FET). Thoracic expansion exercises can include a breath hold at the end of full inspiration; a sniff at the end of full inspiration can also be added to further promote increase in lung volumes. When thoracic expansion exercises are facilitated by a respiratory physiotherapist, the physiotherapist can place their hands over the patient's lower and lateral rib cage; however, the ACBT is effective with or without any assistance [30, 35].

### Mechanisms of action

- Relaxed rhythmical breathing helps control the respiratory rate and respiratory effort during breathing control.
- Thoracic expansion exercises generate a greater trans-airway pressure gradient than in normal breathing [29] enhancing lung volumes via interdependence and collateral ventilation and allowing a decrease in airway resistance to facilitate some air entry behind airway mucus. Collateral ventilation in the lungs is proposed to occur via the alveolar pores of Kohn, inter-bronchiolar channels of Martin and bronchoalveolar channels of Lambert [17, 47].
- Same mechanisms described for FET in the above section.

## Manual percussions

### Description

Rhythmical external oscillations that are applied manually on the chest wall by the physiotherapist.

### Mechanisms of action

- Transmitting the external oscillation to the airways, with the intention to reduce the adhesivity of the mucus layer, change mucus viscoelastic properties and detach mucus from the bronchial wall (decrease adhesivity).
- This effect seems to be dependent on the frequency of oscillations transmitted to the thorax and adequate frequency may be difficult to achieve [34]. Therefore, the manual application of the percussion manoeuvre by the respiratory physiotherapist does not necessarily achieve the optimal frequencies for airway clearance and could be ineffective [37]

### Manual vibrations or shaking (compression and external oscillation)

#### Mechanisms of action

The respiratory physiotherapist / caregiver places their hands over an area of the rib cage/thoracic cavity and apply pressure to the rib cage/thorax as the patient exhales. In addition to the pressure created by the compression, oscillations may be created by the respiratory physiotherapist using their hands to create small undulating movements. [37, 39, 53].

#### Mechanisms of action

- It is anticipated that the mechanical effect created by the pressure and oscillations is transmitted through the ribs into the lungs and airways to loosen and move airway mucus.
- There is a resultant increase in intrapulmonary pressure as well as expiratory flow rate and expired tidal volume, which contribute to loosening airway mucus [37, 39, 53].
- Slow thoracic compressions may reduce peripheral respiratory system resistance [53].
- Vibrations have been shown to increase peak expiratory flow rates in patients with cystic fibrosis and produce oscillations with frequencies which can enhance mucus transport [40].
- Oscillations may alter sputum viscoelastic properties further helping clearance [24]. McCarren et al. [39] have shown that there is a strong linear relationship between the force applied to the chest wall by the respiratory physiotherapists' hands, the chest wall displacement, the intrapleural pressure, and the expiratory flow rate during vibrations [39].
- Additionally, the impact of compression and oscillation combined together is greater than each technique alone [39].

### Gravity-Assisted Drainage (GAD) technique

#### Description

The patient is positioned with the relevant lung segment in a semi vertical position (as able), so that the bronchopulmonary segment with excess of airway mucus is positioned higher than the central airway.

#### Mechanisms of action

- These positions theoretically promote flow of airway mucus from distal to proximal airways, using the effects of gravity.
- The angle of the drainage position, length of time spent in the position as well as the size and resistance in the airway can all impact on the effectiveness of GAD positions [36].
- Gravity is believed to be the main physiological effect for enhancing mucus clearance with this technique, but interestingly greater mucus clearance rates have been observed in dependent lung areas compared to

non-dependent lung areas [32, 42]. Thus, the reduction of airway cross-sectional area in dependent lung regions may play a more important role in improving mucus clearance than gravity.

## Autogenic Drainage

### Description

Patients start breathing repeatedly using low lung volumes in the expiratory reserve volume, with slow and short inspirations, and with active but gentle expiratory phases ("stage 1 or loosening phase"). During this breathing pattern, patients need to keep the glottis opened and a breath-hold may be included after the inspiratory phases. The technique progresses by encouraging patients to breath progressively using high lung volumes into the inspiratory reserve volume and shorten the expiratory phase ("stage 2 and 3 or collect and move up phase") [41]

### Mechanisms of actions

- During the first phase of the technique, a reduction of the cross-sectional area of the airways is attempt [41], and therefore, the lineal air velocity increases, particularly in the peripheral and medium airways, to produce an effective shearing stress on the mucus layer obstructing the bronchial lumen [51].
  - Patients need to keep the glottis open during expiratory phases which increases the intrapleural pressure [41].
  - The breath-hold included after the inspiratory phases promotes collateral ventilation and air movement behind the obstructed lung regions [24]. This physiological effect is emphasised during the second and third phases of the technique, when the patient breathes progressively using high lung volumes towards the inspiratory phase [41].
- In order to avoid dynamic compression during the technique, it is recommended to modulate expiratory effort and coughing is restrained until the mucus has built up into the proximal airways, particularly in patients with reduced elastic recoil [41].

## Slow expiration with glottis opened in lateral posture (ELTGOL)

### Description

The patient lies in lateral decubitus position with the affected lung in the dependent position. If both lungs are affected, the patient will perform the technique in both lateral decubitus. The patient's breathing pattern during the technique involves active slow expirations from functional residual

### Mechanisms of action

- Mucus clearance is enhanced by increasing the airflow velocity in the medial and peripheral airways, while the airway cross-section in the dependent lung is reduced [56] [51] [31].
- The patient's breathing pattern during the active slow expirations with the glottis opened [45] also facilitates a reduction of the cross-sectional ratio of the airways while maintaining the airway patency; thus, enhancing the air-gas interaction without dynamic compression [31, 51].

|                                                                                                                                                                                                                                                          |                                                                                                                                                                                  |
|----------------------------------------------------------------------------------------------------------------------------------------------------------------------------------------------------------------------------------------------------------|----------------------------------------------------------------------------------------------------------------------------------------------------------------------------------|
| <p>capacity to the end of the expiratory reserve volume with the glottis opened [45].</p> <p>The technique may be assisted by a respiratory physiotherapist / caregiver by placing their hands on the upper rib cage and infra-umbilical region [45]</p> | <ul style="list-style-type: none"> <li>▪ The volume of air exhaled seems to be similar regardless if the technique is performed independently or with assistance [45]</li> </ul> |
|----------------------------------------------------------------------------------------------------------------------------------------------------------------------------------------------------------------------------------------------------------|----------------------------------------------------------------------------------------------------------------------------------------------------------------------------------|

#### Airway clearance techniques requiring devices

##### Positive expiratory pressure (PEP) devices (*PEP mask, PiPEP, Threshold PEP, TheraPEP, Resistex, etc.*)

| <u>Description</u>                                                                                                                                                                                                                                                                                              | <u>Mechanisms of action</u>                                                                                                                                                                                                                                                                                                                                                                                                                                                                                                                                                                                        |
|-----------------------------------------------------------------------------------------------------------------------------------------------------------------------------------------------------------------------------------------------------------------------------------------------------------------|--------------------------------------------------------------------------------------------------------------------------------------------------------------------------------------------------------------------------------------------------------------------------------------------------------------------------------------------------------------------------------------------------------------------------------------------------------------------------------------------------------------------------------------------------------------------------------------------------------------------|
| <p>Positive expiratory pressure (PEP) therapy involves the use of a device. During PEP therapy, the patient exhales through a mouthpiece or mask against a mild resistance (positive pressure), which is provided by a flow resistor, threshold resistor or an external flow source during expiration [54].</p> | <ul style="list-style-type: none"> <li>▪ A mild resistance (positive pressure), generally between 10 and 20 cmH<sub>2</sub>O, is usually the target expiratory pressure to achieve with the use of these devices [48]</li> <li>▪ The increase in pressure is transmitted to airways, creating back pressure which splints open the airways during exhalation, preventing premature airway closure and reducing gas trapping [46].</li> <li>▪ PEP therapy may promote collateral ventilation, and therefore hypothetically improve the delivery of air behind the mucus and facilitate airway clearance.</li> </ul> |

##### Oscillating positive expiratory pressure (O-PEP) devices (*Acapella, Flutter, Aerobika, VibraPEP, ShurClear, PocketPEP, RC Cornet, TurboForte, Shaker, Quake, Bottle PEP, Flute, Uniko TPEP, etc.*)

| <u>Description</u>                                                                                                                                                                                                                      | <u>Mechanisms of action</u>                                                                                                                                                                                                                                                                                                                                                                                                                                           |
|-----------------------------------------------------------------------------------------------------------------------------------------------------------------------------------------------------------------------------------------|-----------------------------------------------------------------------------------------------------------------------------------------------------------------------------------------------------------------------------------------------------------------------------------------------------------------------------------------------------------------------------------------------------------------------------------------------------------------------|
| <p>Oscillating positive expiratory pressure (O-PEP) devices are used through a mouthpiece and provide short interruptions during expiration, with the aim to generate positive oscillatory airway pressure and flow waveforms [54].</p> | <ul style="list-style-type: none"> <li>▪ Although the mechanisms of action for the generation of the oscillations is different between the O-PEP devices, the generation of these oscillations or interruptions induce shear forces on the mucus layer and, mechanically reduce the viscoelasticity of airway mucus; thus, enhance mucociliary clearance and ciliary beat [33].</li> <li>▪ Same mechanisms described for PEP devices in the above section.</li> </ul> |

| High-Frequency Chest Wall Oscillation (HFCWO)                                                                                                                                                                                                                                                                                                                                 |                                                                                                                                                                                                                                                                                                                                                                                                                                                                                                                                                                                                                                                                                                                                                                               |
|-------------------------------------------------------------------------------------------------------------------------------------------------------------------------------------------------------------------------------------------------------------------------------------------------------------------------------------------------------------------------------|-------------------------------------------------------------------------------------------------------------------------------------------------------------------------------------------------------------------------------------------------------------------------------------------------------------------------------------------------------------------------------------------------------------------------------------------------------------------------------------------------------------------------------------------------------------------------------------------------------------------------------------------------------------------------------------------------------------------------------------------------------------------------------|
| <p><u>Description</u></p> <p>It is a self-administered technique delivered by a pneumatic vest or band placed around the chest. A high-output compressor or a battery generates a background pressure, which inflates the vest and compresses the patient's chest. A superimposed frequency of air pressure then oscillates with a sinusoidal or triangular waveform [38]</p> | <p><u>Mechanisms of action</u></p> <ul style="list-style-type: none"> <li>External oscillation is a physical mechanism to stimulate the mucus layer hydration and reduce the interfacial tension between the mucus layer and the airway epithelium (adhesivity), change the viscoelastic properties of mucus, and increase the ciliary beating [38]</li> </ul> <p>Alternative methods of compression applied (e.g., chest strapping) have been shown to reduce the pulmonary compliance and increase the lung elastic recoil [49]. Both principles seem to reduce airway resistance (particularly in the smaller airways) and increase expiratory airflow, which facilitates mucus clearance proximally through the two-phase gas-liquid mechanism (airflow bias) [8, 9].</p> |
| Intrapulmonary Percussive Ventilation (IPV)                                                                                                                                                                                                                                                                                                                                   |                                                                                                                                                                                                                                                                                                                                                                                                                                                                                                                                                                                                                                                                                                                                                                               |
| <p><u>Description</u></p> <p>It is an instrumental ACT designed to provide internal thoracic percussion by intermittent high-frequency positive pressure burst of gas [44].</p>                                                                                                                                                                                               | <p><u>Mechanisms of actions</u></p> <ul style="list-style-type: none"> <li>The rapid variation and the high amplitude of the pressure peaks lead to oscillation effects on the airways [43], which enhance mucus clearance, reduce its adhesivity and cohesivity and improve the viscoelastic properties of mucus.</li> <li>Moreover, the asymmetric flow pattern allows the expiratory flow to be greater than the inspiratory flow, and therefore, improves mucus clearance as well [8, 9, 52].</li> </ul> <p>A positive end expiratory pressure (PEEP) is an effect also described in the IPPV that allows recruitment of poorly ventilated lung zones and improves distribution of ventilation [43, 50].</p>                                                              |

Techniques were classified according to whether they require the use of a device or not. FET, forced expiratory technique; ACBT, active cycle of breathing techniques; GAD, gravity-assisted drainage; HFCWO, high-frequency chest wall oscillation; IPV, intrapulmonary percussive ventilation; PEEP, positive end expiratory pressure; O-PEP, oscillating positive expiratory pressure; ELTGOL, slow expiration with glottis opened in lateral posture; PEP, positive expiratory pressure; TPEP, temporary positive expiratory pressure. **Note:** This table does not include the potential contraindications of ACTs and clinicians should check those before using any ACT. Contraindications could include undrained pneumothorax, bullae, shock or severe hemodynamic instability, haemoptysis or active pulmonary haemorrhage, acute bronchospasm (relative contraindication), etc.

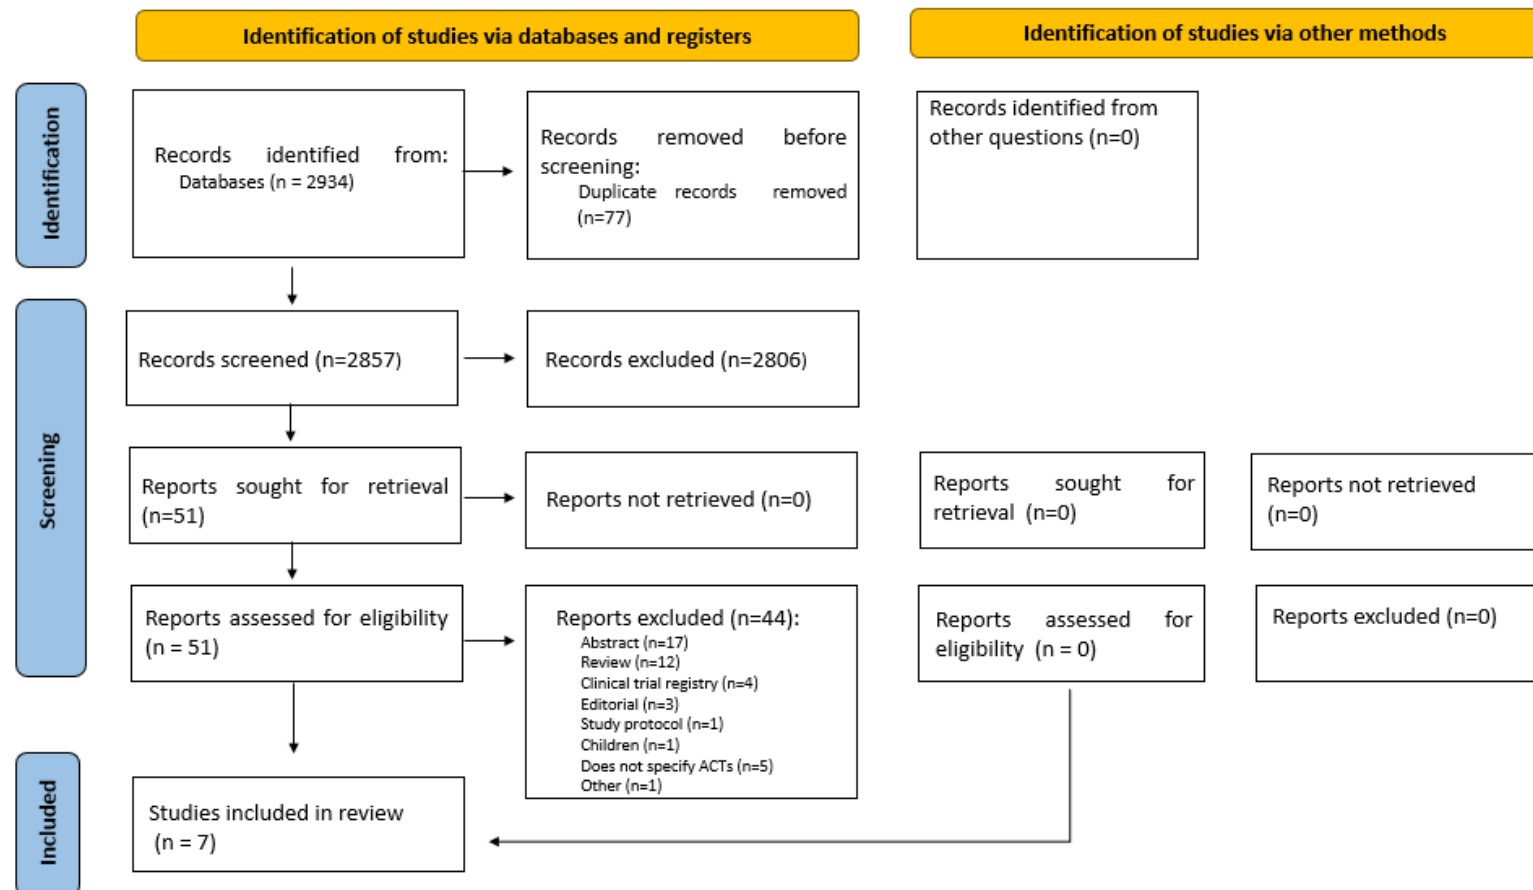

**Figure S3** Literature search flow diagram for Question 3 - Which are the ACTs that are used in the management of adults with bronchiectasis and are there any patterns according to geographical location?

**Table S5.** Summary of the main features of studies included in Question 3 - *Which are the ACTs that are used in the management of adults with bronchiectasis and are there any patterns according to geographical location?*

| First Author, year      | Country                   | Study start - end date | Data collection | Study design    | Sites response rate | HCP response rate | Nº of participants and response rate | Years' experience                 | Areas of work                                                                                                                                                   | Location (urban vs. rural)                                                                                                   | Responders                         | Clinical stage of disease |
|-------------------------|---------------------------|------------------------|-----------------|-----------------|---------------------|-------------------|--------------------------------------|-----------------------------------|-----------------------------------------------------------------------------------------------------------------------------------------------------------------|------------------------------------------------------------------------------------------------------------------------------|------------------------------------|---------------------------|
| O'Neill et al.[55] 2002 | UK                        | NR                     | Survey (NR)     | Cross-sectional | 82%                 | 82%               | n=82 (82%)                           | NR                                | NR                                                                                                                                                              | NR                                                                                                                           | Physiotherapists                   | NR                        |
| Lee et al.[56] 2008     | Australia and New Zealand | NR                     | Survey (mail)   | Cross-sectional | 85%                 | 85%               | n=102 (85%)                          | 10 (2-42)                         | Inpatients (93%) and outpatients (70%)                                                                                                                          | Public/private (6%); tertiary (65%); large major city (1%); large regional/rural (16%)                                       | Cardiorespiratory physiotherapists | NR                        |
| Santos et al.[57] 2016  | Australia                 | July 2012 - May 2013   | Survey (mail)   | Cross-sectional | 88%                 | 70%               | n=169 (55%)                          | <1 2%; 1-5 37%; 6-10 24%; >10 28% | Surgical 54%; General medicine 49%; Intensive care/high-dependency unit 43%; Respiratory 43%; Outpatients 36%; Orthopedics 33%; Rehabilitation 20%; Gerontology | Tertiary/teaching hospitals 47%; rural hospitals 33%; generalist hospitals 9%, private hospitals 6%, specialist hospitals 4% | Physiotherapists                   | NR                        |

|                                 |                                 |                                |                    |                     |    |      |                  |                                                                    |                                                                                                                                     |    |                                                   |                          |
|---------------------------------|---------------------------------|--------------------------------|--------------------|---------------------|----|------|------------------|--------------------------------------------------------------------|-------------------------------------------------------------------------------------------------------------------------------------|----|---------------------------------------------------|--------------------------|
|                                 |                                 |                                |                    |                     |    |      |                  |                                                                    | 18%; Community<br>15%; Neurology<br>14%; Oncology<br>13%; Cardiology<br>11%; Palliative<br>care 11%;<br>Pediatrics 7%;<br>Others 4% |    |                                                   |                          |
| Basavaraj<br>et al.[58]<br>2020 | USA                             | 2008 -<br>2019                 | Registry           | Retrospe<br>ctive   | NR | NR   | n= 535<br>NR     | NR                                                                 | NR                                                                                                                                  | NR | Patients                                          | Stable +<br>exacerbation |
| McShane<br>et al.[59]<br>2020   | Japan                           | April 2020 -<br>NR             | Survey<br>(email)  | Cross-<br>sectional | NR | NR   | n=51             | NR                                                                 | inpatients,<br>outpatients and<br>home settings                                                                                     | NR | Medical<br>doctors<br>(86.8%)<br>Other<br>(13.2%) | NR                       |
| Phillips et<br>al.[60]<br>2021  | Australia<br>and New<br>Zealand | August<br>2016 - April<br>2017 | Survey<br>(online) | Cross-<br>sectional | NR | 0.5% | n=130<br>(0.24%) | <5 28%;<br>6-10<br>17%; 11-<br>15 16%;<br>16-20<br>13%; >21<br>16% | inpatients and<br>outpatients                                                                                                       | NR | Physiotherap<br>ists                              | Exacerbation             |
| Lee et<br>al.[61]<br>2021       | Australia                       | June 2018 -<br>June 2019       | Audit              | Cross-<br>sectional | NR | NR   | n=54             | NR                                                                 | NR                                                                                                                                  | NR | NR                                                | NR                       |

NR, not reported.



### Modified gravity-assisted drainage

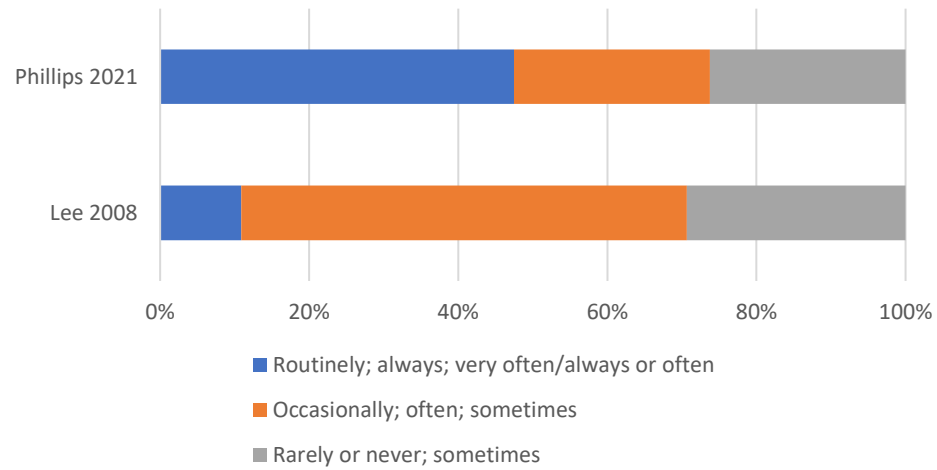

### Positioning

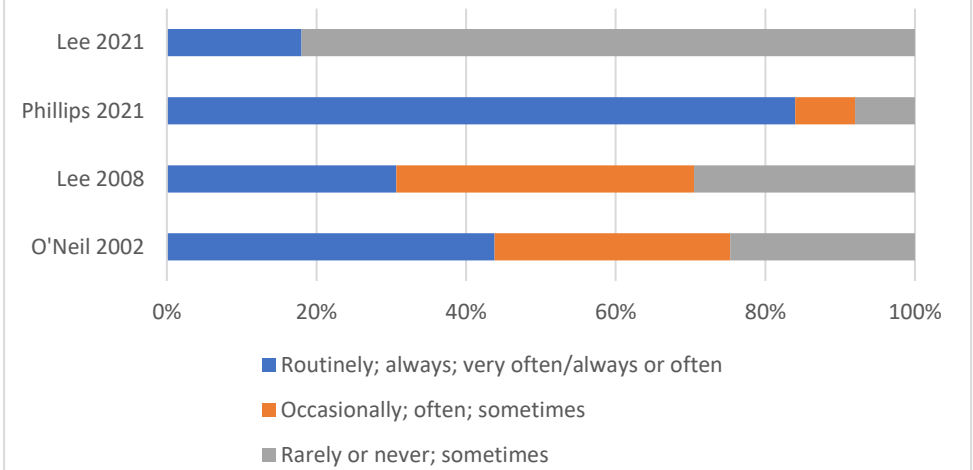

### Positions of ease

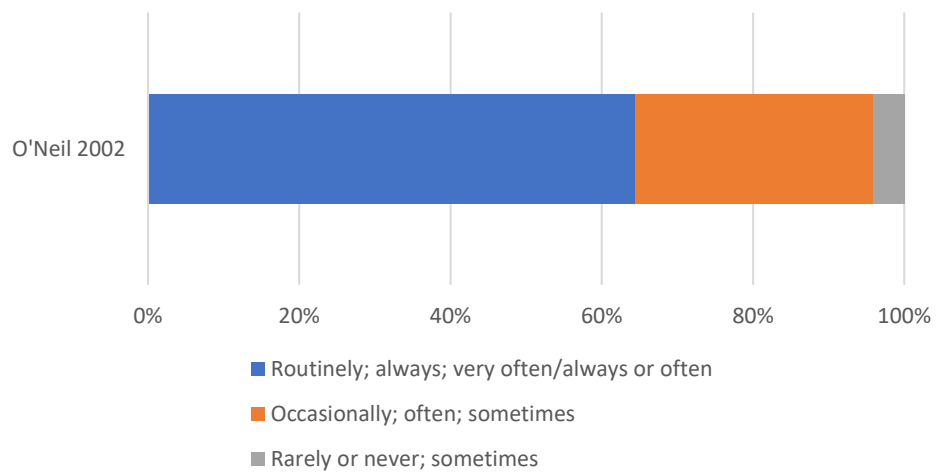

### Deep breathing

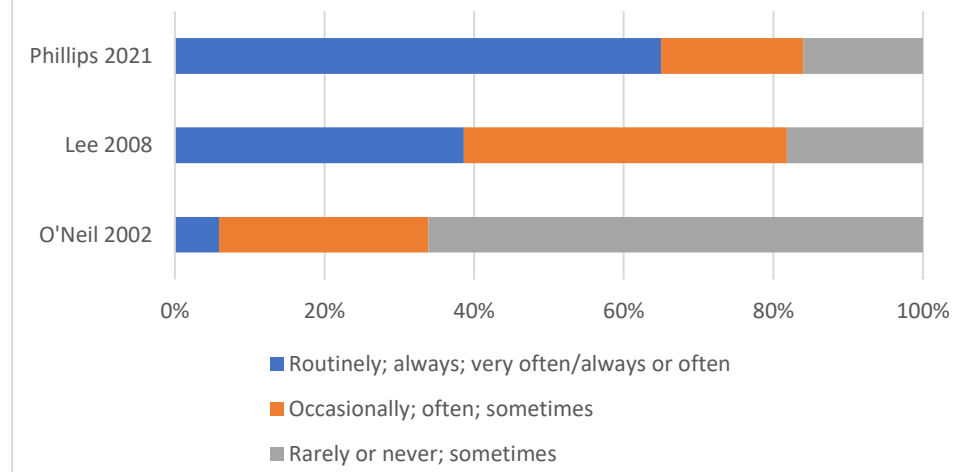

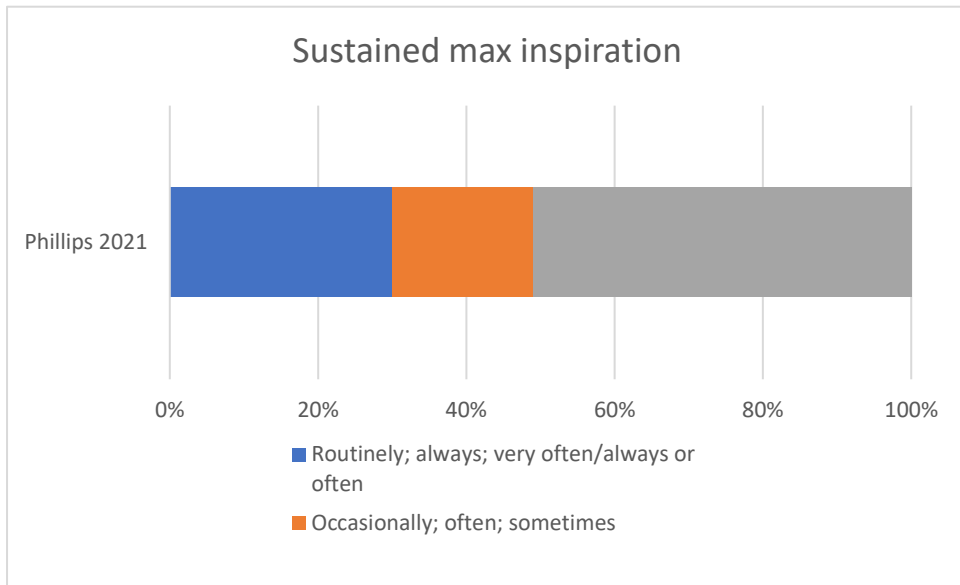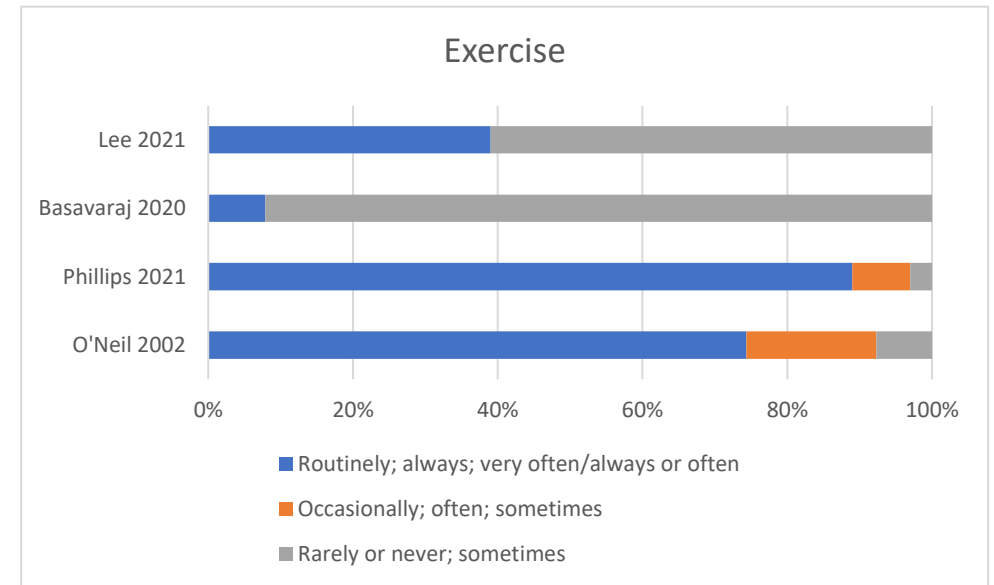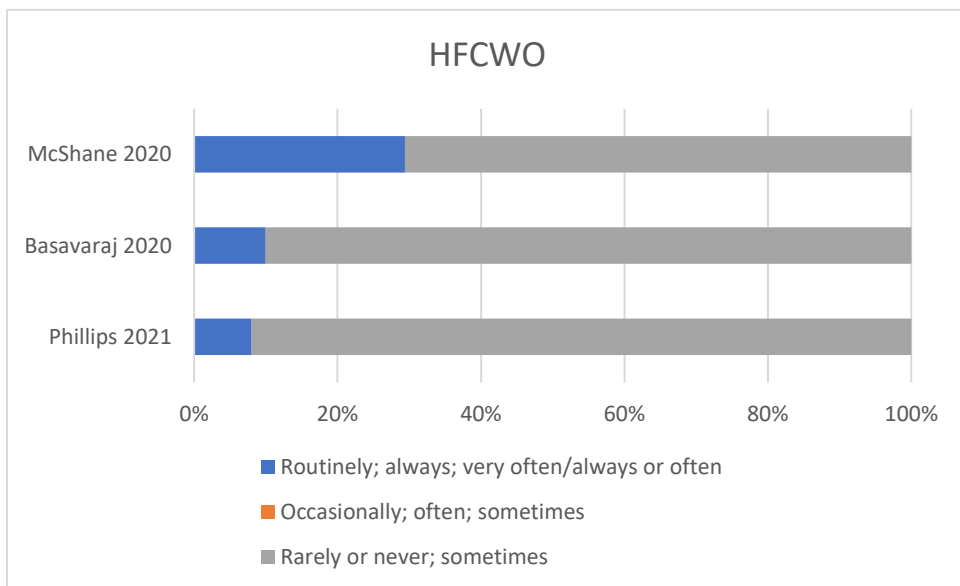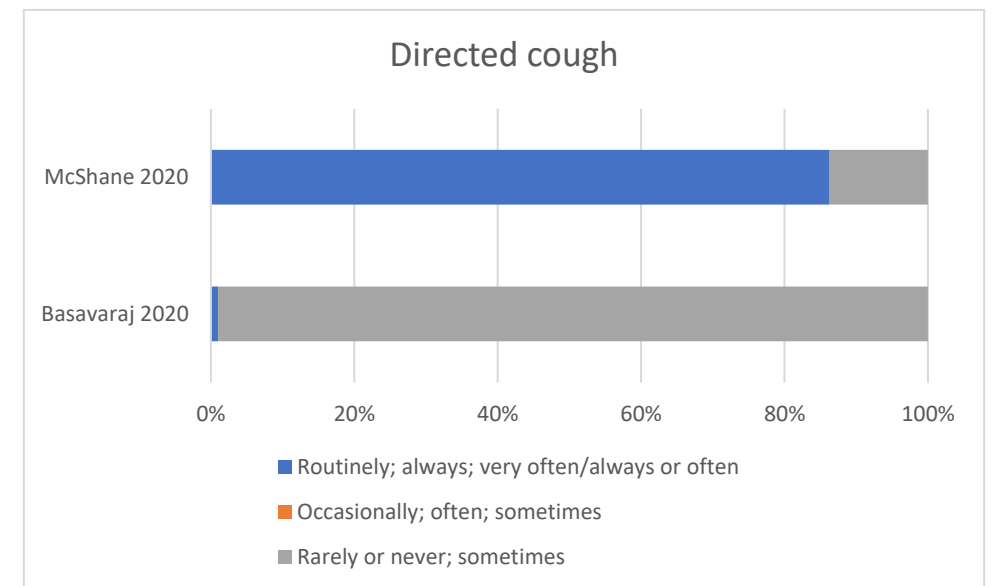

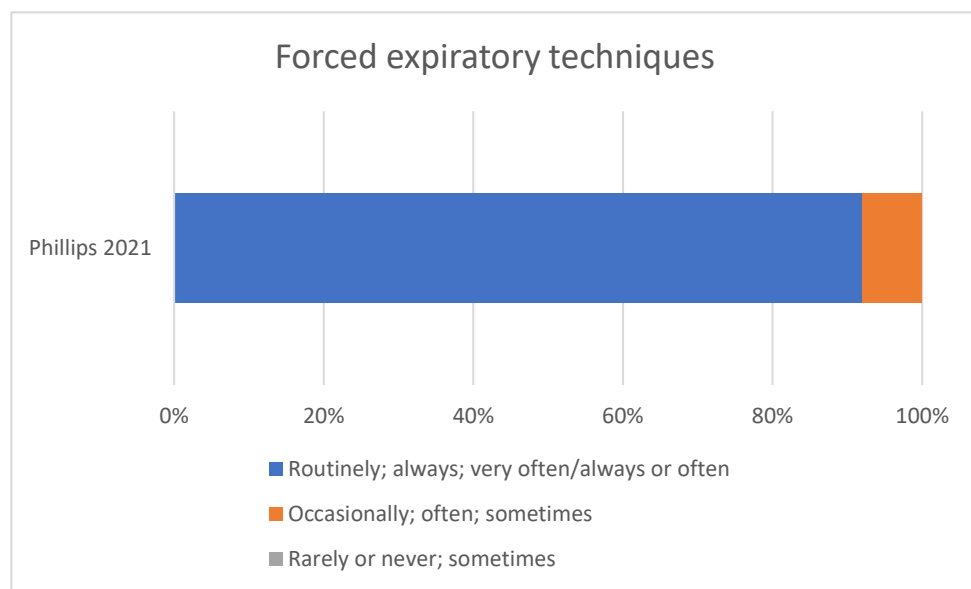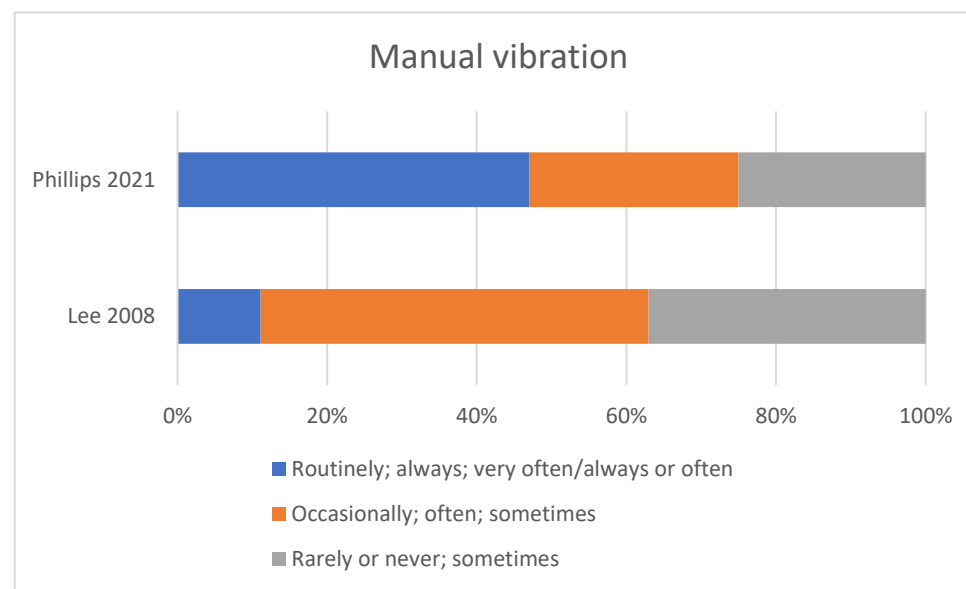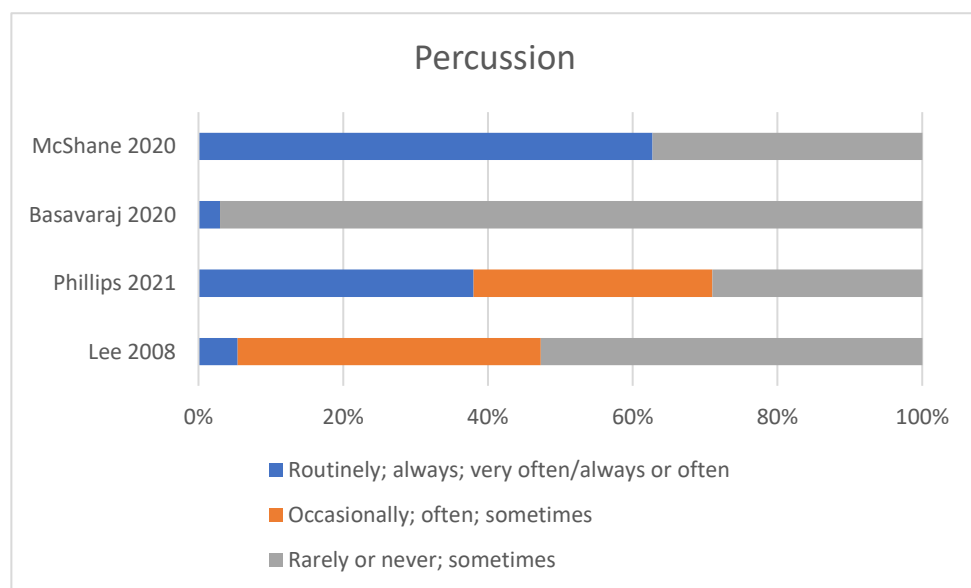

**Figure S4.** Question 3 - Which are the ACTs that are used in the management of adults with bronchiectasis and are there any patterns according to geographical location? Clinical use of airway clearance techniques (ACTs) which were reported as used less frequently compared to other ACTs. The terminology of the graphs follows the terminology of the original studies. Modified gravity-assisted drainage was presented as modified postural drainage in the original studies. HFCWO, high-frequency chest wall oscillation.

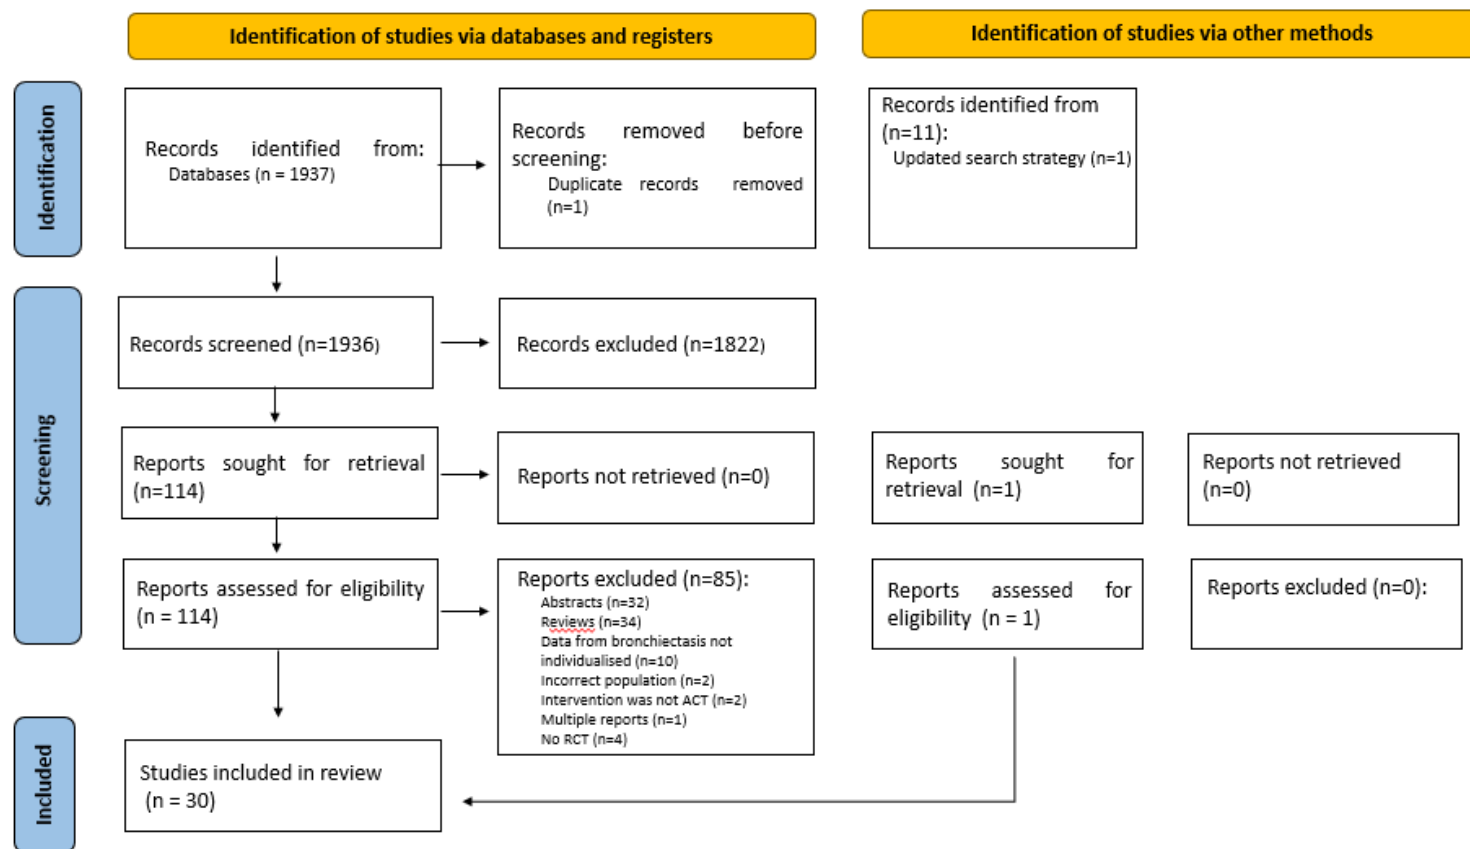

**Figure S5.** Literature search flow diagram for Question 4 - *What is the clinical evidence for the effectiveness of ACTs, in terms of function and disability (e.g., sputum expectoration), activity (e.g., physical activity) and participation (e.g., self-care), in adults with bronchiectasis?*

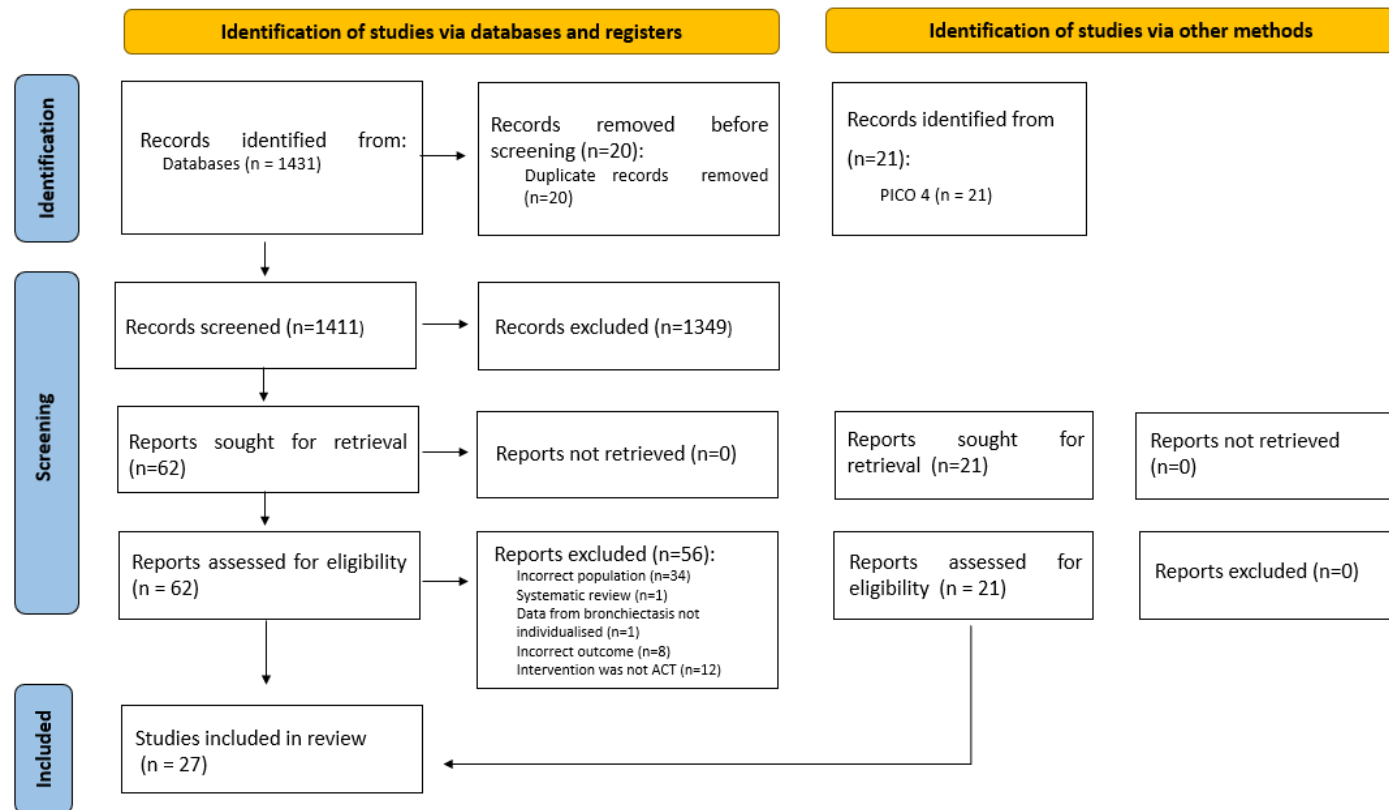

**Figure S6.** Literature search flow diagram for Question 5 - *a. What are the experiences and perceived impact of ACTs on adults with bronchiectasis?* *b. What are the perceived barriers to and enablers of ACTs in adults with bronchiectasis?* One search strategy was conducted for both questions.

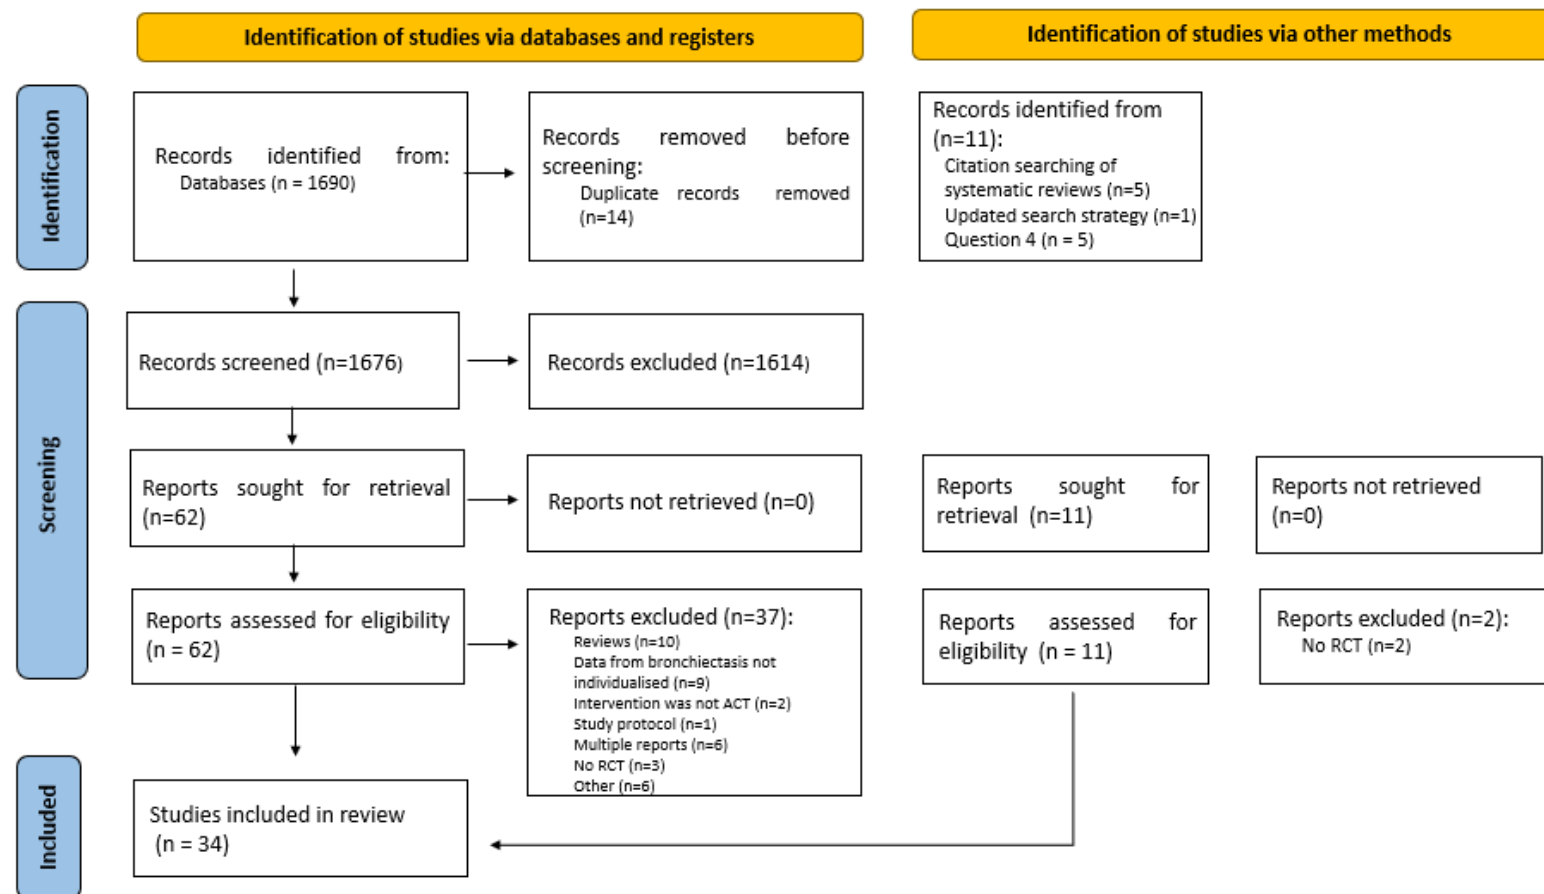

**Figure S7.** Literature search flow diagram for Question 6 - *In adults with bronchiectasis, how should studies for ACTs be conducted to reduce the risk of bias, facilitate comparison of findings, as well as conducting future meta-analyses?*

**Table S6.** Description of the outcome measures used in the included studies for Question 6 - *In adults with bronchiectasis, how should studies for ACTs be conducted to reduce the risk of bias, facilitate comparison of findings, as well as conducting future meta-analyses?*.

| Outcome measures                                        | Timeframe               | Nº of studies that used this outcome measure as primary endpoint | Nº of studies that used this outcome measure to estimate the sample size # | Nº of studies that used this outcome measure as secondary endpoint or not specified |
|---------------------------------------------------------|-------------------------|------------------------------------------------------------------|----------------------------------------------------------------------------|-------------------------------------------------------------------------------------|
| <b>Sputum quantity</b>                                  |                         |                                                                  |                                                                            |                                                                                     |
| Wet sputum weight                                       | During intervention     | 4 (12%)                                                          | 3 (10%)                                                                    | 5 (15%)                                                                             |
|                                                         | ≤4h-after intervention  | 4 (12%)                                                          | 4 (13%)                                                                    | 9 (26%)                                                                             |
|                                                         | 24-h after intervention | 0                                                                | 0                                                                          | 3 (9%)                                                                              |
| Dry sputum weight                                       | During intervention     | 2 (6%)                                                           | 2 (6%)                                                                     | 4 (12%)                                                                             |
|                                                         | ≤4h-after intervention  | 0                                                                | 0                                                                          | 5 (15%)                                                                             |
|                                                         | 24-h after intervention | 0                                                                | 0                                                                          | 0                                                                                   |
| Wet sputum volume                                       | During intervention     | 1 (3%)                                                           | 1 (3%)                                                                     | 12 (35%)                                                                            |
|                                                         | ≤4h-after intervention  | 4 (12%)                                                          | 0                                                                          | 3 (9%)                                                                              |
|                                                         | 24-h after intervention | 2 (6%)                                                           | 1 (3%)                                                                     | 2 (6%)                                                                              |
| Self-reported sputum quantity (Likert scale, VAS, etc.) | During intervention     | 0                                                                | 0                                                                          | 0                                                                                   |
|                                                         | ≤4h-after intervention  | 0                                                                | 0                                                                          | 0                                                                                   |
|                                                         | 24-h after intervention | 0                                                                | 0                                                                          | 1 (3%)                                                                              |
| <b>Sputum colour</b>                                    | Pre / Post intervention | 0                                                                | 0                                                                          | 2 (6%)                                                                              |
| <b>Sputum properties</b>                                |                         |                                                                  |                                                                            |                                                                                     |
| Percentage of solids                                    | Pre / Post intervention | 0                                                                | 0                                                                          | 1 (3%)                                                                              |

|                                                                       |                         |        |        |          |
|-----------------------------------------------------------------------|-------------------------|--------|--------|----------|
| Mucociliary transport<br>(relative velocity)                          | Pre / Post intervention | 0      | 0      | 2 (6%)   |
| Displacement                                                          | Pre / Post intervention | 1 (3%) | 1 (3%) | 1 (3%)   |
| Contact angle                                                         | Pre / Post intervention | 0      | 0      | 1 (3%)   |
| Adhesiveness                                                          | Pre / Post intervention | 0      | 0      | 2 (6%)   |
| Viscosity                                                             | Pre / Post intervention | 0      | 0      | 1 (3%)   |
| Elasticity                                                            | Pre / Post intervention | 0      | 0      | 1 (3%)   |
| Self-reported sputum<br>characteristics                               | Pre / Post intervention | 0      | 0      | 1 (3%)   |
| <b>Sputum cytology</b>                                                | Pre / Post intervention | 0      | 0      | 2 (6%)   |
| <b>Microbiology</b> (bacterial<br>isolation, colony-forming<br>units) | Pre / Post intervention | 0      | 0      | 2 (6%)   |
| <b>Lung function</b>                                                  |                         |        |        |          |
| FEV <sub>1</sub> , FVC, FEF <sub>25-75</sub> %, PEF                   | Pre / Post intervention | 1 (3%) | 0      | 20 (59%) |
| TLC, IC, VC, RV, FRC                                                  | Pre / Post intervention | 0      | 0      | 4 (12%)  |
| LCI                                                                   | Pre / Post intervention | 1 (3%) | 1 (3%) | 0        |
| Oscillometry                                                          | Pre / Post intervention | 1 (3%) | 1 (3%) | 1 (3%)   |
| <b>HRQoL</b>                                                          |                         |        |        |          |
| LCQ                                                                   | Pre / Post intervention | 2 (6%) | 1 (3%) | 5 (15%)  |
| QoL-B                                                                 | Pre / Post intervention | 0      | 0      | 2 (6%)   |
| SGRQ                                                                  | Pre / Post intervention | 0      | 0      | 2 (6%)   |
| CRQ                                                                   | Pre / Post intervention | 0      | 0      | 1 (3%)   |
| CAT                                                                   | Pre / Post intervention | 0      | 0      | 1 (3%)   |
| BHQ                                                                   | Pre / Post intervention | 0      | 0      | 1 (3%)   |
| SF36                                                                  | Pre / Post intervention | 0      | 0      | 1 (3%)   |



|                                                         |                         |        |   |          |
|---------------------------------------------------------|-------------------------|--------|---|----------|
| <b>Nº exacerbations</b>                                 | Follow-up period        | 1 (3%) | 0 | 3 (10%)  |
| <b>Time to first exacerbations</b>                      | Follow-up period        | 0      | 0 | 2 (6%)   |
| <b>Nº hospitalisations</b>                              | Follow-up period        | 0      | 0 | 1 (3%)   |
| <b>Hospitalisation length</b>                           | During intervention     | 0      | 0 | 1 (3%)   |
| <b>Exercise capacity</b>                                |                         |        |   |          |
| 6MWT                                                    | Pre / Post intervention | 0      | 0 | 2 (6%)   |
| ISWT                                                    | Pre / Post intervention | 0      | 0 | 1 (3%)   |
| <b>Respiratory muscle (MIP/MEP)</b>                     | Pre / Post intervention | 0      | 0 | 2 (6%)   |
| <b>Respiratory sounds</b>                               | Pre / Post intervention | 1 (3%) | 0 | 0        |
| <b>Nº of coughs</b>                                     | During intervention     | 0      | 0 | 1 (3%)   |
| <b>Symptoms</b>                                         |                         |        |   |          |
| Breathlessness                                          | Pre / Post intervention | 1 (3%) | 0 | 8 (23%)  |
| BCSS                                                    | Pre / Post intervention |        |   |          |
| Other self-reported symptoms (e.g., fatigue, pain, etc) | Pre / Post intervention | 0      | 0 | 4 (12%)  |
| <b>ABG</b>                                              | Pre / Post intervention | 0      | 0 | 3 (10%)  |
| <b>Biochemistry and haematology</b>                     | Pre / Post intervention | 0      | 0 | 3 (10%)  |
| <b>Vital signs (HR, SpO2, RR)</b>                       | Pre / Post intervention | 1 (3%) | 0 | 9 (26%)  |
| <b>Session length</b>                                   | During intervention     | 0      | 0 | 2 (6%)   |
| <b>Patients' feedback</b>                               | After the intervention  | 0      | 0 | 18 (53%) |

VAS, visual analogical scale; FEV<sub>1</sub>, forced expiratory volume in the first second; FVC, forced vital capacity; FEF<sub>25-75%</sub>, forced expiratory flow between 25-75% of vital capacity; PEF, peak expiratory flow; TLC, total lung capacity; IC, inspiratory capacity; VC, vital capacity; RV, residual volume; FRC, functional residual capacity; LCI, lung clearance index; LCQ, Leicester cough questionnaire; QoL-B, quality of life of bronchiectasis; SGRQ, Saint George respiratory questionnaire; CRQ, chronic respiratory disease questionnaire; CAT, COPD assessment test; BHQ, bronchiectasis health questionnaire; SF36, 36 item short form survey; 6MWT, six minute walk test; ISWT, incremental shuttle walk test; MIP, maximal inspiratory pressure; MEP, maximal expiratory pressure; BCSS, breathlessness, cough and sputum scale; ABG, arterial blood gas; HR, heart rate; SpO<sub>2</sub>, oxygen saturation; RR, respiratory rate. # As sample size estimation is not usually included in abstracts, only full text manuscripts were included in this analysis (n=30).

**Table S7.** Risk of bias of the studies included in Question 6 - *In adults with bronchiectasis, how should studies for ACTs be conducted to reduce the risk of bias, facilitate comparison of findings, as well as conducting future meta-analyses?*

|                                     | Random sequence generation | Allocation concealment | Blinding of participants and personnel | Blinding of outcome assessment | Incomplete outcome data (attrition bias) | Selective reporting (reporting bias) |
|-------------------------------------|----------------------------|------------------------|----------------------------------------|--------------------------------|------------------------------------------|--------------------------------------|
| Morgan et al.[62] 1999, Australia ¥ | ?                          | ?                      | ?                                      | ?                              | ?                                        | ?                                    |
| De Oliveira et al.[63] 2001, Brazil | ?                          | ?                      | ?                                      | ?                              | +                                        | ?                                    |
| Thompson et al.[64] 2002, UK        | ?                          | ?                      | ?                                      | ?                              | +                                        | ?                                    |
| Tsang et al.[65] 2003, Hong Kong    | +                          | ?                      | +                                      | ?                              | -                                        | ?                                    |
| Patterson et al.[66] 2004, UK       | +                          | ?                      | ?                                      | ?                              | +                                        | ?                                    |
| Patterson et al.[67] 2005, UK       | +                          | ?                      | ?                                      | +                              | +                                        | ?                                    |
| Eaton et al.[68] 2007, New Zealand  | +                          | +                      | ?                                      | ?                              | +                                        | ?                                    |
| Patterson et al.[69] 2007, UK       | +                          | ?                      | ?                                      | ?                              | +                                        | ?                                    |
| Murray et al.[70] 2009, UK          | +                          | ?                      | ?                                      | ?                              | +                                        | +                                    |
| Syed et al.[71] 2009, India         | -                          | ?                      | ?                                      | ?                              | +                                        | ?                                    |
| Naraparaju et al.[72] 2010, India   | +                          | ?                      | ?                                      | ?                              | +                                        | ?                                    |

|                                        |  |  |  |  |  |  |
|----------------------------------------|--|--|--|--|--|--|
| Shabari et al.[73] 2011, India         |  |  |  |  |  |  |
| Tambascio et al.[74] 2011, Brazil      |  |  |  |  |  |  |
| Paneroni et al.[75] 2011, Italy        |  |  |  |  |  |  |
| Guimarães et al.[76] 2012, Brazil      |  |  |  |  |  |  |
| Figueiredo et al.[77] 2012, Brazil     |  |  |  |  |  |  |
| Amit et al.[78] 2012, India            |  |  |  |  |  |  |
| Nicolini et al.[79] 2013, Italy        |  |  |  |  |  |  |
| Anand et al.[80] 2014, India           |  |  |  |  |  |  |
| Senthil et al.[81] 2015, India         |  |  |  |  |  |  |
| Semwal et al.[82] 2015, India          |  |  |  |  |  |  |
| Ramos et al.[83] 2015, Brazil          |  |  |  |  |  |  |
| Herrero-Cortina et al.[84] 2016, Spain |  |  |  |  |  |  |
| AbdelHalim et al.[85] 2016, Egypt      |  |  |  |  |  |  |
| Silva et al.[86] 2017, Australia       |  |  |  |  |  |  |
| Tambascio et al.[87] 2017, Brazil      |  |  |  |  |  |  |

|                                          |  |  |  |  |  |  |
|------------------------------------------|--|--|--|--|--|--|
| Üzmezoğlu et al.[88] 2018, Turkey        |  |  |  |  |  |  |
| Muñoz et al.[89] 2018, Spain             |  |  |  |  |  |  |
| Herrero-Cortina et al.[90] 2018, Spain ¥ |  |  |  |  |  |  |
| Herrero-Cortina et al.[91] 2019, Spain ¥ |  |  |  |  |  |  |
| de Souza et al.[53] 2019, Brazil         |  |  |  |  |  |  |
| Santos et al.[92] 2020, Australia        |  |  |  |  |  |  |
| Nicolini et al.[93] 2020, Italy ¥        |  |  |  |  |  |  |
| Livnat et al.[94] 2021, Israel           |  |  |  |  |  |  |

● low risk of bias; ? unclear risk of bias; ● high risk of bias. Only randomised trials were included in the analysis. Multiple reports from the same study were also excluded. ¥ Abstracts.

Scoring based on the reviewer's judgement for each risk of bias category.

## References

1. Troosters T, Langer D, Burtin C, Chatwin M, Clini EM, Emtner M, Gosselink R, Grant K, Inal-Ince D, Lewko A, Main E, Oberwaldner B, Tabin N, Pitta F. A guide for respiratory physiotherapy postgraduate education: presentation of the harmonised curriculum. *Eur Respir J* 2019: 53(6).
2. Lee AL, Hill CJ, Cecins N, Jenkins S, McDonald CF, Burge AT, Rautela L, Stirling RG, Thompson PJ, Holland AE. The short and long term effects of exercise training in non-cystic fibrosis bronchiectasis--a randomised controlled trial. *Respir Res* 2014: 15: 44.
3. Chalmers JD, Crichton ML, Brady G, Finch S, Lonergan M, Fardon TC. Pulmonary rehabilitation after exacerbation of bronchiectasis: a pilot randomized controlled trial. *BMC Pulm Med* 2019;19(85):Epub 2019.
4. Newall C, Stockley RA, Hill SL. Exercise training and inspiratory muscle training in patients with bronchiectasis. *Thorax* 2005: 60(11): 943-948.
5. Dwyer TJ, Robbins L, Kelly P, Piper AJ, Bell SC, Bye PT. Non-invasive ventilation used as an adjunct to airway clearance treatments improves lung function during an acute exacerbation of cystic fibrosis: a randomised trial. *J Physiother* 2015: 61(3): 142-147.
6. Stanford G, Parrott H, Bilton D, Agent P, Banya W, Simmonds N. Randomised cross-over trial evaluating the short-term effects of non-invasive ventilation as an adjunct to airway clearance techniques in adults with cystic fibrosis. *BMJ Open Respir Res* 2019: 6(1): e000399.
7. Mead J, Takishima T, Leith D. Stress distribution in lungs: a model of pulmonary elasticity. *J Appl Physiol* 1970: 28(5): 596-608.
8. Kim CS, Rodriguez CR, Eldridge MA, Sackner MA. Criteria for mucus transport in the airways by two-phase gas-liquid flow mechanism. *J Appl Physiol* (1985) 1986: 60(3): 901-907.
9. Kim CS, Iglesias AJ, Sackner MA. Mucus clearance by two-phase gas-liquid flow mechanism: asymmetric periodic flow model. *J Appl Physiol* (1985) 1987: 62(3): 959-971.
10. Crawford AB, Cotton DJ, Paiva M, Engel LA. Effect of airway closure on ventilation distribution. *J Appl Physiol* (1985) 1989: 66(6): 2511-2515.
11. Girod S, Zahm JM, Plotkowski C, Beck G, Puchelle E. Role of the physiochemical properties of mucus in the protection of the respiratory epithelium. *Eur Respir J* 1992: 5(4): 477-487.
12. Randell SH, Boucher RC, Group UoNCVL. Effective mucus clearance is essential for respiratory health. *Am J Respir Cell Mol Biol* 2006: 35(1): 20-28.
13. Button B, Boucher RC, Group UoNCVL. Role of mechanical stress in regulating airway surface hydration and mucus clearance rates. *Respir Physiol Neurobiol* 2008: 163(1-3): 189-201.
14. Rubin BK. The role of mucus in cough research. *Lung* 2010: 188 Suppl 1: S69-72.
15. Rubin BK. Mucus and mucins. *Otolaryngol Clin North Am* 2010: 43(1): 27-34, vii-viii.
16. Tambascio J, de Souza HC, Martinez JA, Afonso JL, Jardim JR, Gastaldi AC. The influence of purulence on ciliary and cough transport in bronchiectasis. *Respir Care* 2013: 58(12): 2101-2106.
17. Button BM, Button B. Structure and function of the mucus clearance system of the lung. *Cold Spring Harb Perspect Med* 2013: 3(8).
18. Rubin BK. Secretion properties, clearance, and therapy in airway disease. *Transl Respir Med* 2014: 2: 6.
19. Anderson WH, Coakley RD, Button B, Henderson AG, Zeman KL, Alexis NE, Peden DB, Lazarowski ER, Davis CW, Bailey S, Fuller F, Almond M, Qaqish B, Bordonali E, Rubinstein M, Bennett WD, Kesimer M, Boucher RC. The Relationship of Mucus Concentration (Hydration) to Mucus Osmotic Pressure and Transport in Chronic Bronchitis. *Am J Respir Crit Care Med* 2015: 192(2): 182-190.
20. Sibila O, Suarez-Cuartin G, Rodrigo-Troyano A, Fardon TC, Finch S, Mateus EF, Garcia-Bellmunt L, Castillo D, Vidal S, Sanchez-Reus F, Restrepo MI, Chalmers JD. Secreted mucins and airway bacterial colonization in non-CF bronchiectasis. *Respirology* 2015: 20(7): 1082-1088.
21. Button B, Anderson WH, Boucher RC. Mucus Hyperconcentration as a Unifying Aspect of the Chronic Bronchitic Phenotype. *Ann Am Thorac Soc* 2016: 13 Suppl 2: S156-162.
22. Bennett WD, Henderson AG, Donaldson SH. Hydrator Therapies for Chronic Bronchitis. Lessons from Cystic Fibrosis. *Ann Am Thorac Soc* 2016: 13 Suppl 2: S186-190.
23. Chalmers JD. Bronchiectasis: Phenotyping a Complex Disease. *COPD* 2017: 14(sup1): S12-S18.

24. McIlwaine M, Bradley J, Elborn JS, Moran F. Personalising airway clearance in chronic lung disease. *Eur Respir Rev* 2017: 26(143).
25. Gramegna A, Amati F, Terranova L, Sotgiu G, Tarsia P, Miglietta D, Calderazzo MA, Aliberti S, Blasi F. Neutrophil elastase in bronchiectasis. *Respir Res* 2017: 18(1): 211.
26. Flume PA, Chalmers JD, Olivier KN. Advances in bronchiectasis: endotyping, genetics, microbiome, and disease heterogeneity. *Lancet* 2018: 392(10150): 880-890.
27. Contarini M, Shoemark A, Rademacher J, Finch S, Gramegna A, Gaffuri M, Roncoroni L, Seia M, Ringshausen FC, Welte T, Blasi F, Aliberti S, Chalmers JD. Why, when and how to investigate primary ciliary dyskinesia in adult patients with bronchiectasis. *Multidiscip Respir Med* 2018: 13(Supplement 1): 26.
28. Ramsey KA, Chen ACH, Radicioni G, Lourie R, Martin M, Broomfield A, Sheng YH, Hasnain SZ, Radford-Smith G, Simms LA, Burr L, Thornton DJ, Bowler SD, Livengood S, Ceppe A, Knowles MR, Noone PG, Sr., Donaldson SH, Hill DB, Ehre C, Button B, Alexis NE, Kesimer M, Boucher RC, McGuckin MA. Airway Mucus Hyperconcentration in Non-Cystic Fibrosis Bronchiectasis. *Am J Respir Crit Care Med* 2020: 201(6): 661-670.
29. Mead J, Turner JM, Macklem PT, Little JB. Significance of the relationship between lung recoil and maximum expiratory flow. *J Appl Physiol* 1967: 22(1): 95-108.
30. Pryor JA, Webber BA, Hodson ME, Batten JC. Evaluation of the forced expiration technique as an adjunct to postural drainage in treatment of cystic fibrosis. *British Medical Journal* 1979: 2(6187): 417-418.
31. Postiaux G, Lens E, Alsteens G, Portelange P. Efficacité de l'expiration lente totale glotte ouverte en decubitus latéral (ELTGOL): sur la toilette en périphérie de l'arbre trachéobronchique. *Ann Kinésithér* 1990: 17(3): 87-99.
32. Lannefors L, Wollmer P. Mucus clearance with three chest physiotherapy regimes in cystic fibrosis: a comparison between postural drainage, PEP and physical exercise. *Eur Respir J* 1992: 5(6): 748-753.
33. App EM, Kieselmann R, Reinhardt D, Lindemann H, Dasgupta B, King M, Brand P. Sputum rheology changes in cystic fibrosis lung disease following two different types of physiotherapy: flutter vs autogenic drainage. *Chest* 1998: 114(1): 171-177.
34. van der Schans CP, Postma DS, Koëter GH, Rubin BK. Physiotherapy and bronchial mucus transport. *Eur Respir J* 1999: 13(6): 1477-1486.
35. Pryor JA. Physiotherapy for airway clearance in adults. *Eur Respir J* 1999: 14(6): 1418-1424.
36. Cecins NM, Jenkins SC, Pengelley J, Ryan G. The active cycle of breathing techniques--to tip or not to tip? *Respir Med* 1999: 93(9): 660-665.
37. Wong WP, Paratz JD, Wilson K, Burns YR. Hemodynamic and ventilatory effects of manual respiratory physiotherapy techniques of chest clapping, vibration, and shaking in an animal model. *J Appl Physiol* (1985) 2003: 95(3): 991-998.
38. Dosman CF, Jones RL. High-frequency chest compression: a summary of the literature. *Can Respir J* 2005: 12(1): 37-41.
39. McCarren B, Alison JA, Herbert RD. Manual vibration increases expiratory flow rate via increased intrapleural pressure in healthy adults: an experimental study. *Aust J Physiother* 2006: 52(4): 267-271.
40. McCarren B, Alison JA. Physiological effects of vibration in subjects with cystic fibrosis. *Eur Respir J* 2006: 27(6): 1204-1209.
41. Agostini P, Knowles N. Autogenic drainage: the technique, physiological basis and evidence. *Physiotherapy* 2007: 93: 157-163.
42. Martins JA, Dornelas de Andrade A, Britto RR, Lara R, Parreira VF. Effect of slow expiration with glottis opened in lateral posture (ELTGOL) on mucus clearance in stable patients with chronic bronchitis. *Respir Care* 2012: 57(3): 420-426.
43. Riffard G, Toussaint M. [Intrapulmonary percussion ventilation: operation and settings]. *Rev Mal Respir* 2012: 29(2): 347-354.
44. Testa A, Galeri S, Villafane JH, Corbellini C, Pillastrini P, Negrini S. Efficacy of short-term intrapulmonary percussive ventilation in patients with chronic obstructive pulmonary disease. *Disabil Rehabil* 2015: 37(10): 899-903.
45. Lanza FC, Alves CS, Dos Santos RL, de Camargo AA, Dal Corso S. Expiratory Reserve Volume During Slow Expiration With Glottis Opened in Infralateral Decubitus Position (ELTGOL) in Chronic Pulmonary Disease: Technique Description and Reproducibility. *Respir Care* 2015: 60(3): 406-411.
46. Fagevik Olsen M, Lannefors L, Westerdahl E. Positive expiratory pressure - Common clinical applications and physiological effects. *Respir Med* 2015: 109(3): 297-307.
47. Terry PB, Traystman RJ. The clinical significance of collateral ventilation. *Ann Am Thorac Soc* 2016: 13(12): 2251-2257.

48. Lee AL, Burge AT, Holland AE. Positive expiratory pressure therapy versus other airway clearance techniques for bronchiectasis. *Cochrane Database Syst Rev* 2017: 9: CD011699.
49. Taher H, Bauer C, Abston E, Kaczka DW, Bhatt SP, Zabner J, Brower RG, Beichel RR, Eberlein M. Chest wall strapping increases expiratory airflow and detectable airway segments in computer tomographic scans of normal and obstructed lungs. *J Appl Physiol (1985)* 2018; 124(5): 1186-1193.
50. Nicolini A, Grecchi B, Ferrari-Bravo M, Barlaschini C. Safety and effectiveness of the high-frequency chest wall oscillation vs intrapulmonary percussive ventilation in patients with severe COPD. *Int J Chron Obstruct Pulmon Dis* 2018; 13: 617-625.
51. Wong C, Sullivan C, Jayaram L. ELTGOL airway clearance in bronchiectasis: laying the bricks of evidence. *Eur Respir J* 2018; 51(1).
52. Reyckler G, Debie E, Contal O, Audag N. Intrapulmonary percussive ventilation as an airway clearance technique in subjects with chronic obstructive airway diseases. *Respir Care* 2018; 63(5): 620-631.
53. de Souza S, dos Santos DO, Dutra de Souza HC, Baddini-Martinez JA, Koenigkam Santos M, Gastaldi AC. Acute Effects of Oscillatory PEP and Thoracic Compression on Secretion Removal and Impedance of the Respiratory System in Non-Cystic Fibrosis Bronchiectasis. *Respir Care* 2019; 64(7): 818-827.
54. Demchuk AM, Chatburn RL. Performance Characteristics of Positive Expiratory Pressure Devices. *Respir Care* 2021; 66(3): 482-493.
55. O'Neill B, Bradley JM, McArdle N, MacMahon J. The current physiotherapy management of patients with bronchiectasis: a UK survey. *Int J Clin Pract* 2002; 56(1): 34-35.
56. Lee A, Button B, Denehy L. Current Australian and New Zealand physiotherapy practice in the management of patients with bronchiectasis and chronic obstructive pulmonary disease. *New Zealand Journal of Physiotherapy* 2008; 36(2): 49-58.
57. Santos, Milross MA, Alison JA. Therapist-Made Bubble-Positive Expiratory Pressure: A Survey of Physiotherapists in Australia. *Cardiopulmonary Physical Therapy Journal (Lippincott Williams & Wilkins)* 2016; 27(1): 3-10.
58. Basavaraj, Choate R, Addrizzo-Harris D, Aksamit TR, Barker A, Daley CL, Anne Daniels ML, Eden E, DiMango A, Fennelly K, Griffith DE, Johnson MM, Knowles MR, Metersky ML, Noone PG, O'Donnell AE, Olivier KN, Salathe MA, Schmid A, Thomashow B. Airway Clearance Techniques in Bronchiectasis: Analysis from the United States Bronchiectasis and Non-TB Mycobacteria Research Registry. *Chest* 2020; 158(4): 1376-1384.
59. McShane PJ, Philley JV, Prieto DA, Aksamit TR. Global Attitudes of Health Care Providers About Aerosolized Airway Clearance Therapy in Bronchiectasis Patients During the Coronavirus Disease 2019 Pandemic. *Chronic Obstr Pulm Dis* 2021; 8(3): 319-325.
60. Phillips J, Lee A, Pope R, Hing W. Physiotherapists' use of airway clearance techniques during an acute exacerbation of bronchiectasis: a survey study. *Arch Physiother* 2021; 11(1): 3.
61. Lee AL, Baenziger S, Louey A, Jennings S, Solin P, Hoy R. A review of physiotherapy practice for people with bronchiectasis. *ERJ Open Res* 2021; 7(2).
62. Morgan LC, Maxwell, L., De Longh, R., Peters, M. J., & Rutland, J. Comparison of flutter device(FD) with postural drainage (PD) in adult patients with non-CF bronchiectasis. *Respirology* 1999; 4(SUPPL. 1), A40.
63. De Oliveira Antunes LC, De Crvalho SM, Borges FD, De Assis VL, De Godoy I. A study of the conventional chest physiotherapy versus Flutter VRP1 in the treatment of patients carrying bronchiectasis. *Salusvita* 2001; 20(1): 23-33.
64. Thompson C, Harrison S, Ashley J, Day K, Smith D. Randomised crossover study of the flutter device and the active cycle of breathing technique in non-cystic fibrosis bronchiectasis *Thorax* 2002; 57: 446-448.
65. Tsang S, Jones A. Postural drainage or flutter device in conjunction with breathing and coughing compared to breathing and coughing alone in improving secretion removal and lung function in patients with acute exacerbation of bronchiectasis: a pilot study *Hong Kong Physiotherapy Journal* 2003; 21:29-36.
66. Patterson J, Bradley J, Elborn J. Airway clearance in bronchiectasis: a randomised crossover trial of active cycle of breathing techniques (incorporating postural drainage and vibration) versus test of incremental respiratory endurance *Chron Respir Dis* 2004; 1: 127-130.
67. Patterson J, Bradley J, Hewitt O, Bradbury I, Elborn J. Airway clearance in bronchiectasis: a randomised crossover trial of active cycle of breathing techniques versus acapella *Respiration* 2005; 72: 239-242.
68. Eaton T, Young P, Zeng I, Kolbe J. A randomized evaluation of the acute efficacy, acceptability and tolerability of flutter and active cycle of breathing with and without postural drainage in non-cystic fibrosis bronchiectasis. *Chron Respir Dis* 2007; 4(1): 23-30.
69. Patterson J, Hewitt O, Kent L, Bradbury I, Elborn J, Bradley J. Acapella versus 'usual airway clearance' during acute exacerbation in bronchiectasis: a randomised crossover trial *Chron Respir Dis* 2007; 4: 67-74.



70. Murray MP, Pentland JL, Hill AT. A randomised crossover trial of chest physiotherapy in non-cystic fibrosis bronchiectasis. *Eur Respir J* 2009; 34(5): 1086-1092.
71. Syed N, Maiya A, Kumar T. Active cycles of breathing technique (ACBT) versus conventional chest physical therapy on airway clearance in bronchiectasis: a crossover trial *Advances in Physiotherapy* 2009; 11(4): 193-198.
72. Naraparaju S, Vaishali K, Venkatesan P, Acharya V. A comparison of the Acapella and a threshold inspiratory muscle trainer for sputum clearance in bronchiectasis-A pilot study. *Physiother Theory Pract* 2010; 26(6): 353-357.
73. Shabari, Prem V, Alaparthi G, Vaishali K, acharya V. Comparison of acapella and RC-Cornet for airway clearance in bronchiectasis - a pilot study. *International Journal of Current Research and Review* 2011; 3(11): 138-148.
74. Tambascio J, de Souza LT, Lisboa RM, Passarelli RdCV, de Souza HCD, Gastaldi AC. The influence of Flutter RVRP1 components on mucus transport of patients with bronchiectasis. *Respir Med* 2011; 105(9): 1316-1321.
75. Paneroni M, Clini E, Simonelli C, Bianchi L, Antoni F, Vitacca M. Safety and efficacy of short-term intrapulmonary percussive ventilation in patients with bronchiectasis. *Respir Care* 2011; 56(7): 984-988.
76. Guimarães FS, Moço VJ, Menezes SL, Dias CM, Salles RE, Lopes AJ. Effects of ELTGOL and Flutter VRP1® on the dynamic and static pulmonary volumes and on the secretion clearance of patients with bronchiectasis. *Rev Bras Fisioter* 2012; 16(2): 108-113.
77. Figueiredo PH, Zin WA, Guimarães FS. Flutter valve improves respiratory mechanics and sputum production in patients with bronchiectasis. *Physiother Res Int* 2012; 17(1): 12-20.
78. Amit VA, Vaishali K, Gopal KA, Shyam K, Zulfeequer, Vishak A. Comparison of quake and RC-Cornet for airway clearance in bronchiectasis: a randomised crossover trial. *International journal of health sciences and research* 2012; 2(6): 20-27.
79. Nicolini A, Cardini F, Landucci N, Lanata S, Ferrari-Bravo M, Barlascini C. Effectiveness of treatment with high-frequency chest wall oscillation in patients with bronchiectasis. *BMC Pulm Med* 2013; 13: 21.
80. Anand SR, Anandhi D. Immediate effects of Active Cycle of Breathing Technique and Conventional Chest Physiotherapy in Subjects with Bronchiectasis - A Comparative Study. *Indian Journal of Physiotherapy and Occupational Therapy* 2014;8(1):105-112
81. Senthil P, Suchithra E, Koushik Kumar N. Effectiveness of active cycle of breathing techniques (ACBT) versus ACBT with Acapella on airway clearance in bronchiectasis. *International Journal of Physical Education, Sports and Health* 2015;1(4 Part A):10-13 2015.
82. Semwal S, Mitra S, Singh S. Autogenic drainage versus acapella for airway clearance in patients with bronchiectasis: randomised crossover trial *International Journal of Health Sciences and Research* 2015; 5(9): 323-327.
83. Ramos EMC, Ramos D, Moreira GL, Macchione M, Guimaraes ET, Rodrigues FMM, de Souza AAL, Saldiva PHN, Jardim JR. Viscoelastic properties of bronchial mucus after respiratory physiotherapy in subjects with bronchiectasis. *Respir Care* 2015; 60(5): 724-730.
84. Herrero-Cortina B, Vilaró J, Martí D, Torres A, San Miguel-Pagola M, Alcaraz V, Polverino E. Short-term effects of three slow expiratory airway clearance techniques in patients with bronchiectasis: a randomised crossover trial. *Physiotherapy* 2016; 102(4): 357-364.
85. AbdelHalim HA, AboElNaga HH, Fathy KA. Comparison between active cycles of breathing with postural drainage versus conventional chest physiotherapy in subjects with bronchiectasis. *The egyptian journal of chest diseases and tuberculosis* 2016; 65(1): 157-165.
86. Silva, Greer TA, Morgan LC, Li F, Farah CS. A Comparison of 2 Respiratory Devices for Sputum Clearance in Adults With Non-Cystic Fibrosis Bronchiectasis. *Respir Care* 2017; 62(10): 1291-1297.
87. Tambascio J, de Souza HCD, Martinez R, Baddini-Martinez JA, Barnes PJ, Gastaldi AC. Effects of an Airway Clearance Device on Inflammation, Bacteriology, and Mucus Transport in Bronchiectasis. *Respir Care* 2017; 62(8): 1067-1074.
88. Uzmezoglu B, Altıay G, Ozdemir L, Tuna H, Sut N. The Efficacy of Flutter R and Active Cycle of Breathing Techniques in Patients with Bronchiectasis: A Prospective, Randomized, Comparative Study. *Turkish thoracic journal* 2018; 19(3): 103-109.
89. Muñoz G, de Gracia J, Buxó M, Alvarez A, Vendrell M. Long-term benefits of airway clearance in bronchiectasis: a randomised placebo-controlled trial. *Eur Respir J* 2018; 51(1).
90. Herrero-Cortina BH, Membrado-Lope O, Miguel-Pagola MS, Francin-Gallego M, Saez-Perez JA, Polverino E. Effects of a home programme of airway clearance techniques on adventitious respiratory sounds in patients with bronchiectasis: A randomised controlled trial. *Eur Resp J* 2018; 52(Supplement 62).
91. Herrero-Cortina BH, Miguel-Pagola MS, Francin-Gallego M, Saez-Perez JA, Polverino E. Long-term efficacy of a home-based airway clearance programme to improve cough severity in patients with bronchiectasis:a randomised controlled trial. *Eur Respir J* 2019; 54(Supplement 63).

92. Santos M, Mllross M, McKenzie D, Alison J. Bubble-positive expiratory pressure device and sputum clearance in bronchiectasis: a randomised cross-over study. *Physiotherapy Research International* 2020: 25: e1839.
93. Nicolini A, Grecchi B, Banfi P. Effectiveness of two high frequency chest wall oscillation techniques in patients with bronchiectasis: a randomized controlled preliminary study. *Panminerva medica* 2020.
94. Livnat G, Yaari N, Stein N, Bentur L, Hanna M, Harel M, Adir Y, Shteinberg M. 4-week daily airway clearance using oscillating positive-end expiratory pressure versus autogenic drainage in bronchiectasis patients: a randomised controlled trial *European Respiratory Journal Open Research* 2021: 7: 00426-02021.
